# Supplementary material for: Natural terpenoid glycosides with in vitro/vivo antithrombotic profiles from the leaves of Crataegus pinnatifida
Source: Royal Society of Chemistry journal article supplement (doi:10.1039/c7ra10768d), 2017-01-01
Supplement: c7ra10768d1.pdf [file c7ra10768d1.pdf]

## Electronic Supplementary Information

# Natural terpenoid glycosides with *in vitro/vivo* antithrombotic profiles from the leaves of *Crataegus pinnatifida*

Pin-Yi Gao,<sup>a,b</sup> Ling-Zhi Li,<sup>a\*</sup> Ke-Chun Liu,<sup>c</sup> Chen Sun,<sup>c</sup> Xue Sun,<sup>a</sup> Ya-Nan Wu,<sup>a</sup> Shao-Jiang Song<sup>a\*</sup>

<sup>a</sup> Key Laboratory of Structure-Based Drug Design and Discovery, Ministry of Education, School of Traditional Chinese Materia Medica, Shenyang Pharmaceutical University, Shenyang 110016, People's Republic of China

<sup>b</sup> College of Pharmaceutical and Biotechnology Engineering, Institute of Functional Molecules, Shenyang University of Chemical Technology, Shenyang 110142, People's Republic of China

<sup>c</sup> Biology Institute of Shandong Academy of Sciences, Jinan, People's Republic of China

\*Corresponding author. Tel.: +86-24-23986088. Fax: +86-24-23986510. (S.-J. Song).

E-mail addresses: [songsj99@163.com](mailto:songsj99@163.com). (S.-J. Song).

## Experiment section:

**SI-E.1.** Extraction and isolation

**SI-E.2.** Characteristic data of compounds **1-15** and 2D NMR correlations of **1-4**

**SI-E.3.** Acid Hydrolysis of **1-4**

**SI-E.4.** Preparation of the (R)- and (S)-MTPA Esters of **4a**.

**SI-E.5.** <sup>13</sup>C NMR calculation section

**SI-E.6.** Evaluation of antiplatelet activity in rat PRP.

**SI-E.7.** Antithrombotic assay using a transgenic zebrafish system

## Table

**SI-table 1.** Conformations of **1a** were Obtained after the Optimization.

**SI-table 2.** Conformations of **2a** were Obtained after the Optimization.

**SI-table 3.** Deviations between the calculated and experimental <sup>13</sup>C NMR chemical shifts for stereoisomers (2*S*, 2*R*) of **2**

**SI-table 4.** Deviations between the calculated and experimental <sup>13</sup>C NMR chemical shifts for stereoisomers (2*R*/5*R*/6*R*, 2*R*/5*R*/6*S*) of **4a**.

**SI-table 5.** Deviations between the calculated and experimental <sup>13</sup>C NMR chemical shifts for stereoisomers (2*R*/5*S*/6*R*, 2*R*/5*S*/6*S*) of **4a**.

**SI-table 6.** Calculated Boltzmann distributions and optical rotations for each conformer of **4** and **3**.

## Spectra figure

**S1.** <sup>1</sup>H NMR spectrum (600MHz, DMSO-*d*6) of compound **1**

**S2.** <sup>13</sup>C NMR spectrum (150MHz, DMSO-*d*6) of compound **1**

**S3.** HSQC spectrum (600MHz, DMSO-*d*6) of compound **1**

**S4.** HMBC spectrum (600MHz, DMSO-*d*6) of compound **1**

**S5.** NOESY spectrum (600MHz, DMSO-*d*6) of compound **1**

**S6.** The HREIMS spectrum of compound **1**

**S7.** <sup>1</sup>H NMR spectrum (600MHz, DMSO-*d*6) of compound **2**

**S8.** <sup>13</sup>C NMR spectrum (150MHz, DMSO-*d*6) of compound **2**

**S9.** HSQC spectrum (600MHz, DMSO-*d*6) of compound **2**

**S10.** HMBC spectrum (600MHz, DMSO-*d*6) of compound **2**

**S11.** NOESY spectrum (600MHz, DMSO-*d*6) of compound **2**

**S12.** The HREIMS spectrum of compound **2**

**S13.** <sup>1</sup>H NMR spectrum (600MHz, DMSO-*d*6) of compound **3**

**S14.** <sup>13</sup>C NMR spectrum (150MHz, DMSO-*d*6) of compound **3**

**S15.** H-H COSY spectrum (600MHz, DMSO-*d*6) of compound **3**

**S16.** HMBC spectrum (600MHz, DMSO-*d*6) of compound **3**

**S17.** NOESY spectrum (600MHz, DMSO-*d*6) of compound **3**

**S18.** The HREIMS spectrum of compound **3**

**S19.** <sup>1</sup>H NMR spectrum (600MHz, DMSO-*d*6) of compound **4**

**S20.** <sup>13</sup>C NMR spectrum (150MHz, DMSO-*d*6) of compound **4**

**S21.** HSQC spectrum (600MHz, DMSO-*d*6) of compound **4**

**S22.** H-H COSY spectrum (600MHz, DMSO-*d*6) of compound **4**

**S23.** The HREIMS spectrum of compound **4**

**S24.** Rh<sub>2</sub>(OCOCF<sub>3</sub>)<sub>4</sub>.induced CD spectrum of **1a**

**S25.** Rh<sub>2</sub>(OCOCF<sub>3</sub>)<sub>4</sub>.induced CD spectrum of **5**

## Experiment section:

### SI-E.1. Extraction and isolation

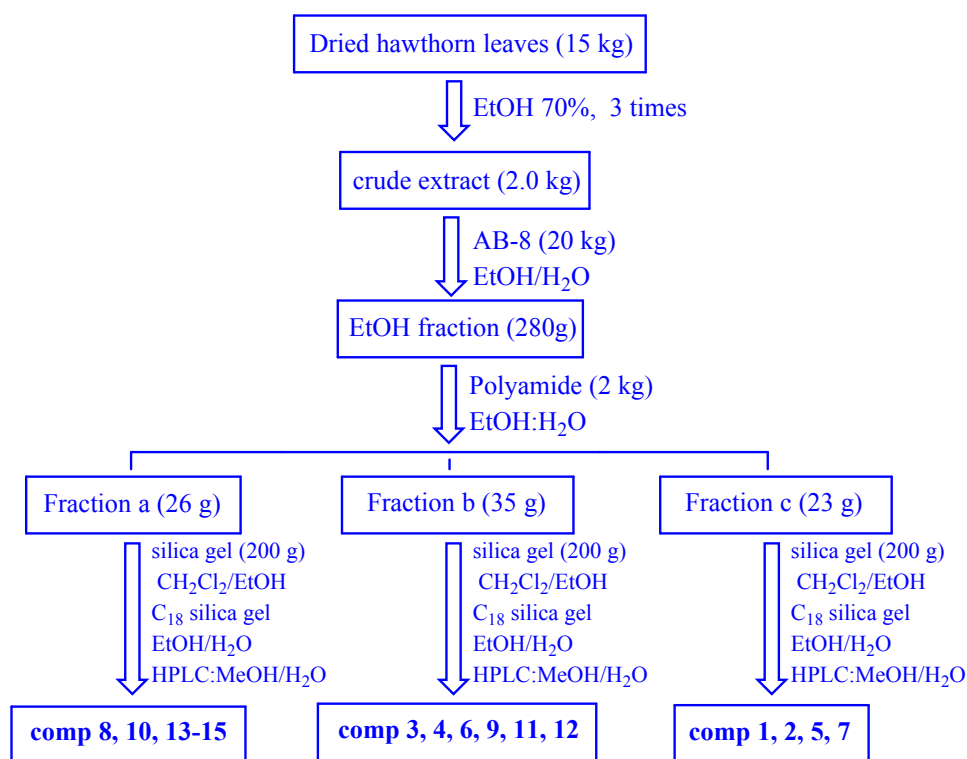

SI-figure-1. Extraction and isolation of **1-15**

### SI-E.2. Characteristic data of compounds **1-15** and 2D NMR correlations of **1-4**

*Norhawthornoid A (1)*: colorless oil;  $[\alpha]_{20}^D -3.5$ , ( $c$  0.15, MeOH); UV (MeOH)  $\lambda_{\max}$  ( $\log \epsilon$ ) 208 (2.21) nm; ECD (MeOH)  $\lambda$  ( $\Delta\epsilon$ ) 209 (-39.50) nm; see Table 1 for  $^1\text{H}$  NMR,  $^{13}\text{C}$  NMR; HRESIMS  $m/z$ : 483.2582  $[\text{M} + \text{H}]^+$  (calcd.  $\text{C}_{25}\text{H}_{39}\text{O}_9$  483.2589).

*Norhawthornoid B (2)*: colorless oil;  $[\alpha]_{20}^D -8.5$ , ( $c$  0.12, MeOH); UV (MeOH)  $\lambda_{\max}$  ( $\log \epsilon$ ) 228 (2.21) nm; ECD (MeOH)  $\lambda$  ( $\Delta\epsilon$ ) 230 (-9.80) nm; see Table 1 for  $^1\text{H}$  NMR,  $^{13}\text{C}$  NMR; HRESIMS  $m/z$ : 471.2588  $[\text{M} + \text{H}]^+$  (calcd.  $\text{C}_{24}\text{H}_{38}\text{O}_9$  471.2589).

*Pinnatifidanoside F (3)*: colorless oil;  $[\alpha]_{20}^D -2.8$ , ( $c$  0.4, MeOH); see Table 2 for  $^1\text{H}$  NMR,  $^{13}\text{C}$  NMR; HRESIMS  $m/z$ : 401.2536  $[\text{M} + \text{H}]^+$  (calcd.  $\text{C}_{21}\text{H}_{37}\text{O}_7$  401.2534).

*Pinnatifidanoside G (4)*: colorless oil;  $[\alpha]_{20}^D -7.5$ , ( $c$  0.2, MeOH); see Table 2 for  $^1\text{H}$  NMR,  $^{13}\text{C}$  NMR; HRESIMS  $m/z$ : 419.2636  $[\text{M} + \text{H}]^+$  (calcd.  $\text{C}_{21}\text{H}_{39}\text{O}_8$  419.2639).

*Shnyegenin B (5)*: Colourless oil; ESI-MS  $m/z$ : 277  $[\text{M}+\text{Na}]^+$ ;  $^1\text{H}$  NMR (DMSO- $d_6$ , 300 MHz)  $\delta_{\text{H}}$  5.19 (1H,  $J = 17.1$ , 1.8 Hz, H-1a), 5.04 (1H,  $J = 10.8$ , 1.8 Hz, H-1b), 5.91 (1H,  $J = 17.1$ , 10.8 Hz, H-2), 2.20 (1H, m, H-4a), 2.21 (1H, m, H-4b) 5.57 (1H,  $J = 7.2$ , 3.9 Hz, H-5), 5.58 (1H,  $J = 7.2$  Hz, H-6), 1.69 (1H, m, H-8a), 1.89 (1H, m, H-8b), 1.82 (1H, m, H-9a), 1.82 (1H, m, H-9b), 3.76 (1H,  $J = 6.6$  Hz, H-10), 1.26 (3H, s, H-12), 1.31 (3H, s, H-13), 1.21 (3H, s, H-14) and 1.12 (3H, s, H-15).  $^{13}\text{C}$ -NMR (DMSO- $d_6$ , 75 MHz):  $\delta_{\text{C}}$  111.9 (C-1), 144.7 (C-2), 72.6 (C-3), 45.5 (C-4), 122.1 (C-5), 139.5 (C-6), 82.6 (C-7), 37.8 (C-8), 26.3 (C-9), 85.4 (C-10), 71.1 (C-11), 27.1 (C-12), 27.1 (C-13), 27.1 (C-14), 24.1 (C-15).

*Shnyeside B (6)*: Colourless oil; ESI-MS  $m/z$ : 439  $[\text{M}+\text{Na}]^+$ ;  $^1\text{H}$  NMR (DMSO- $d_6$ , 300 MHz)  $\delta_{\text{H}}$  5.10 (1H,  $J = 17.1$ , 1.8 Hz, H-1a), 4.91 (1H,  $J = 10.8$ , 1.8 Hz, H-1b), 5.84 (1H,  $J = 17.1$ , 10.8 Hz, H-2), 2.10 (1H,  $J = 3.9$  Hz, H-4a), 2.10 (1H,  $J = 3.9$  Hz, H-4b) 5.54 (1H,  $J = 7.2$ , 3.9 Hz, H-5), 5.53 (1H,  $J = 7.2$  Hz, H-6), 1.67 (1H, m, H-8a), 1.67 (1H, m, H-8b), 1.81 (1H, m, H-9a), 1.91 (1H, m, H-9b), 3.86 (1H,  $J = 6.6$  Hz, H-10), 1.09 (3H, s, H-12), 1.16 (3H, s, H-13), 1.16 (3H, s, H-14), 1.07 (3H, s, H-15), 4.35 (1H,  $J = 7.8$  Hz, H-1'), 2.84 (1H,  $J = 7.8$  Hz, H-2'), 3.10 (1H,  $J = 7.8$  Hz, H-3'), 3.00 (1H, m, H-4'), 3.02 (1H, m, H-5'), 3.35 (1H,  $J = 10.8$  Hz, H-6'a), 3.62 (1H,  $J = 10.8$  Hz, H-6'b).  $^{13}\text{C}$ -NMR (DMSO- $d_6$ , 75 MHz):  $\delta_{\text{C}}$  111.3 (C-1), 146.4 (C-2), 71.9 (C-3), 45.5 (C-4), 123.0 (C-5), 139.4 (C-6), 82.5 (C-7), 38.1 (C-8), 26.7 (C-9), 83.9 (C-10), 78.3 (C-11), 27.3 (C-12), 26.4 (C-13), 24.0 (C-14), 22.2 (C-15), 97.6 (C-1'), 74.0 (C-2'), 77.5 (C-3'), 70.6 (C-4'), 77.0 (C-5'), 61.6 (C-6').

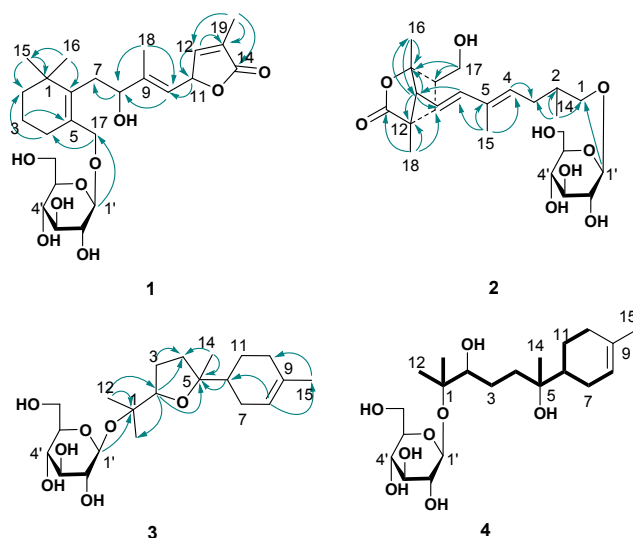

SI-figure-2. HMBC correlations (arrows) of **1-3**, and  $^1\text{H}$ - $^1\text{H}$  COSY (bold lines) of **4**

(*3S,5R,6R,7E,9S*)-megastiman-7-ene-3,5,6,9-tetrol (**7**): Colourless oil;  $^1\text{H}$  NMR (DMSO- $d_6$ , 300 MHz)  $\delta_{\text{H}}$  5.90 (1H, d,  $J = 15.9$  Hz), 5.66 (1H, d,  $J = 15.9$  Hz), 1.08 (3H, s), 0.99 (3H, s), 0.71 (3H, s), 1.13 (3H, d,  $J = 6.3$  Hz), 4.15 (1H, m), 3.84 (1H, m).  $^{13}\text{C}$ -NMR (DMSO- $d_6$ , 75 MHz):  $\delta_{\text{C}}$  41.2 (C-1), 46.7 (C-2), 63.6 (C-3), 46.2 (C-4), 76.7 (C-5), 77.8 (C-6), 129.9 (C-7), 135.7 (C-8), 67.8 (C-9), 25.5 (C-10), 28.0 (C-11), 26.6 (C-12), 27.8 (C-13).

*Euodionosides D* (**8**): Colourless oil;  $^1\text{H}$  NMR (DMSO- $d_6$ , 300 MHz)  $\delta_{\text{H}}$  5.97 (1H, d,  $J = 15.9$  Hz), 5.72 (1H, d,  $J = 15.9$  Hz), 1.05 (3H, s), 1.00 (3H, s), 0.72 (3H, s), 1.20 (3H, d,  $J = 6.0$  Hz), 4.14 (1H, d,  $J = 7.8$  Hz).  $^{13}\text{C}$ -NMR (DMSO- $d_6$ , 75 MHz):  $\delta_{\text{C}}$  41.3 (C-1), 46.6 (C-2), 63.5 (C-3), 46.0 (C-4), 77.0 (C-5), 77.5 (C-6), 133.5 (C-7), 132.6 (C-8), 76.6 (C-9), 22.3 (C-10), 28.0 (C-11), 26.6 (C-12), 27.9 (C-13), 101.7 (C-1'), 74.5 (C-2'), 77.7 (C-3'), 71.0 (C-4'), 77.7 (C-5'), 61.9 (C-6').

(*6R,9R*)-3-oxo- $\alpha$ -ionol-9-*O*- $\beta$ -D-glucopyranoside (**9**): Colourless oil;  $^1\text{H}$  NMR (DMSO- $d_6$ , 300 MHz)  $\delta_{\text{H}}$  5.79 (1H, s), 5.66 (1H, dd,  $J = 15.0$ , 6.6 Hz), 5.56 (1H, dd,  $J = 15.0$ , 9.6 Hz), 1.83 (3H, s), 0.93 (3H, s), 0.89 (3H, s), 1.17 (3H, d,  $J = 6.6$  Hz), 4.16 (1H, d,  $J = 7.8$  Hz).

(*6S,7E,9R*)-6,9-Dihydroxy-4,7-megastiymadien-3-one-9-*O*-[ $\beta$ -D-xylopyranosy-(1-6) $\beta$ -D-glucopyranoside] (**10**): Colourless oil;  $^1\text{H}$  NMR (DMSO- $d_6$ , 300 MHz)  $\delta_{\text{H}}$  5.79 (1H, s), 5.68 (1H, dd,  $J = 15.3$ , 6.0 Hz), 5.56 (1H, dd,  $J = 15.3$ , 9.0 Hz), 1.84 (3H, s), 0.94 (3H, s), 0.90 (3H, s), 1.18

(3H, d,  $J=6.3$  Hz), 4.18 (1H, d,  $J = 7.2$  Hz), 4.17 (1H, d,  $J = 7.2$  Hz).  $^{13}\text{C-NMR}$  (DMSO- $d_6$ , 75 MHz):  $\delta_{\text{C}}$  36.5 (C-1), 48.0 (C-2), 199.5 (C-3), 125.7 (C-4), 163.0 (C-5), 55.3 (C-6), 128.1 (C-7), 137.4 (C-8), 76.5 (C-9), 21.5 (C-10), 27.6 (C-11), 28.3 (C-12), 23.8 (C-13), 101.6 (C-1'), 74.4 (C-2'), 77.5 (C-3'), 70.6 (C-4'), 75.3 (C-5'), 69.0 (C-6'), 104.8 (C-1''), 74.2 (C-2''), 77.5 (C-3''), 70.4 (C-4''), 66.5 (C-5'').

*Linarioside A (11)*: Colourless oil;  $^1\text{H NMR}$  (DMSO- $d_6$ , 300 MHz)  $\delta_{\text{H}}$  1.54 (3H, s), 0.97 (3H, s), 0.96 (3H, s), 1.08 (3H, d,  $J=6.0$  Hz), 4.17 (1H, d,  $J = 7.5$  Hz).  $^{13}\text{C-NMR}$  (DMSO- $d_6$ , 75 MHz):  $\delta_{\text{C}}$  37.6 (C-1), 48.6 (C-2), 62.9 (C-3), 37.3 (C-4), 124.0 (C-5), 136.6 (C-6), 23.7 (C-7), 42.8 (C-8), 73.7 (C-9), 19.5 (C-10), 28.3 (C-11), 29.6 (C-12), 19.3 (C-13), 100.8 (C-1'), 73.7 (C-2'), 76.9 (C-3'), 70.2 (C-4'), 76.7 (C-5'), 61.2 (C-6').

*Linarioside B (12)*: Colourless oil;  $^1\text{H NMR}$  (DMSO- $d_6$ , 300 MHz)  $\delta_{\text{H}}$  1.57 (3H, s), 0.99 (3H, s), 0.98 (3H, s), 1.04 (3H, d,  $J=6.0$  Hz), 4.25 (1H, d,  $J = 7.8$  Hz).  $^{13}\text{C-NMR}$  (DMSO- $d_6$ , 75 MHz):  $\delta_{\text{C}}$  39.3 (C-1), 46.8 (C-2), 70.9 (C-3), 38.1 (C-4), 124.0 (C-5), 138.0 (C-6), 24.9 (C-7), 40.9 (C-8), 67.1 (C-9), 20.3 (C-10), 29.0 (C-11), 30.4 (C-12), 24.2 (C-13), 101.4 (C-1'), 74.3 (C-2'), 77.5 (C-3'), 71.0 (C-4'), 77.5 (C-5'), 61.9 (C-6').

*Linarioside C (13)*: Colourless oil;  $^1\text{H NMR}$  (DMSO- $d_6$ , 300 MHz)  $\delta_{\text{H}}$  1.57 (3H, s), 1.06 (3H, s), 1.03 (3H, s), 1.11 (3H, d,  $J=6.0$  Hz), 4.26 (1H, d,  $J = 7.8$  Hz), 4.17 (1H, d,  $J = 7.5$  Hz).  $^{13}\text{C-NMR}$  (DMSO- $d_6$ , 75 MHz):  $\delta_{\text{C}}$  38.1 (C-1), 47.2 (C-2), 71.1 (C-3), 39.5 (C-4), 124.5 (C-5), 138.2 (C-6), 24.5 (C-7), 39.0 (C-8), 74.4 (C-9), 20.2 (C-10), 29.1 (C-11), 30.4 (C-12), 20.4 (C-13), 101.6 (C-1'), 74.4 (C-2'), 77.6 (C-3'), 71.1 (C-4'), 77.6 (C-5'), 62.1 (C-6'), 101.6 (C-1''), 74.4 (C-2''), 77.6 (C-3''), 71.0 (C-4''), 77.6 (C-5''), 62.1 (C-6'').

*3,9-dihydroxy-5-megastigmen-3-O-[\beta-D-xylopyranosy-(1-6)\beta-D-glucopyranoside] (14)*: Colourless oil;  $^1\text{H NMR}$  (DMSO- $d_6$ , 300 MHz)  $\delta_{\text{H}}$  1.57 (3H, s), 0.98 (6H, s), 1.04 (3H, d,  $J=6.0$  Hz), 4.24 (1H, d,  $J = 7.8$  Hz), 4.20 (1H, d,  $J = 7.5$  Hz).  $^{13}\text{C-NMR}$  (DMSO- $d_6$ , 75 MHz):  $\delta_{\text{C}}$  37.8 (C-1), 46.5 (C-2), 71.0 (C-3), 39.6 (C-4), 123.7 (C-5), 137.6 (C-6), 24.6 (C-7), 40.1 (C-8), 66.8 (C-9), 23.9

(C-10), 28.8 (C-11), 30.1 (C-12), 20.0 (C-13), 101.1 (C-1'), 73.9 (C-2'), 77.1 (C-3'), 70.5 (C-4'), 76.1 (C-5'), 68.8 (C-6'), 104.4 (C-1''), 73.9 (C-2''), 77.0 (C-3''), 70.1 (C-4''), 66.1 (C-5'').

*Pinnatifidanoside C (15)*: Colourless oil;  $^1\text{H}$  NMR (DMSO- $d_6$ , 300 MHz)  $\delta_{\text{H}}$  2.07 (3H, s), 1.54 (3H, s), 0.98 (6H, s), 4.24 (1H, d,  $J = 8.1$  Hz), 4.20 (1H, d,  $J = 7.5$  Hz).  $^{13}\text{C}$ -NMR (DMSO- $d_6$ , 75 MHz):  $\delta_{\text{C}}$  37.3 (C-1), 45.9 (C-2), 70.0 (C-3), 38.0 (C-4), 124.3 (C-5), 136.2 (C-6), 21.4 (C-7), 43.6 (C-8), 208.2 (C-9), 29.7 (C-10), 28.4 (C-11), 29.4 (C-12), 19.5 (C-13), 103.9 (C-1'), 73.4 (C-2'), 76.7 (C-3'), 69.6 (C-4'), 75.8 (C-5'), 68.3 (C-6'), 100.5 (C-1''), 73.4 (C-2''), 76.6 (C-3''), 70.3 (C-4''), 65.7 (C-5'').

### SI-E.3. Acid Hydrolysis of 1-4.

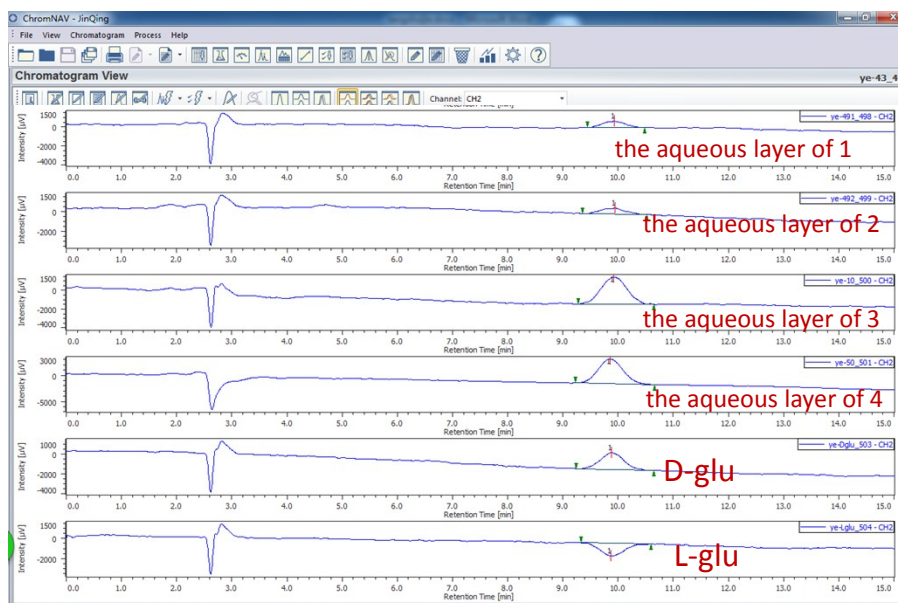

SI-figure-3. Retention times for authentic samples after acid hydrolysis of 1-4

### SI-E.4. Preparation of the (R)- and (S)-MTPA Esters of 4a

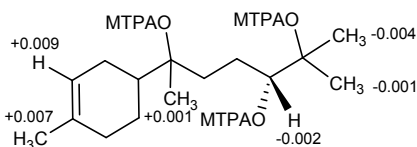

SI-figure-4.  $\Delta\delta_{\text{H}}$  values for the MTPA esters of 4a

### SI-E.5. $^{13}\text{C}$ NMR calculation section (SI-table 3 and 4.)

After optimization of the major conformers (>98%) was performed using the Gaussian 09 program at B3LYP/6-31G(d) level. Computed chemical shifts reported in this study were determined using the GIAO method in Gaussian 09 at the B3LYP/6-311+G(d) level of theory. The scaled calculated  $^{13}\text{C}$  NMR chemical shifts were obtained from the following:  $\delta_{\text{scal. calc.}} = (\delta_{\text{calc.}} - \text{intercept})/\text{slope}$ .<sup>1-3</sup> The results were evaluated in terms of  $R^2$ , MaxDev and AveDev. Among them,  $R^2$  is its coefficient of determination. MaxDev is the maximum absolute deviation with respect to the experimental chemical shifts  $\delta_{\text{exp}}$ . AveDev is the average absolute deviation, computed as  $(1/n) \sum_{i=1}^n |\delta_{\text{scale. calc.}} - \delta_{\text{exp.}}|$ .

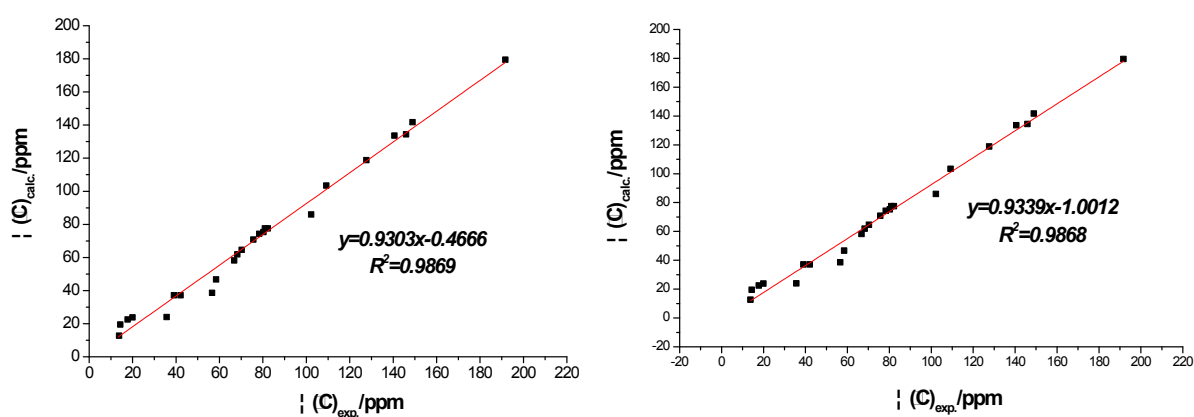

SI-figure-5. Correlation between experimental and calculated  $^{13}\text{C}$  chemical shifts of stereoisomers (2*S* left, 2*R* right) of **2**

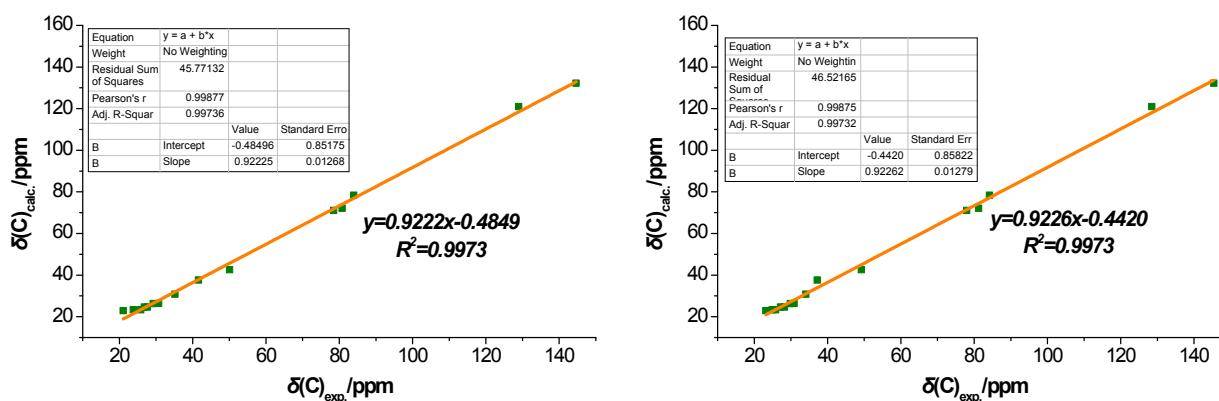

SI-figure-6. Correlation between experimental and calculated  $^{13}\text{C}$  chemical shifts of stereoisomers (2*R*/5*R*/6*R* left, 2*R*/5*R*/6*S* right) of **4a**



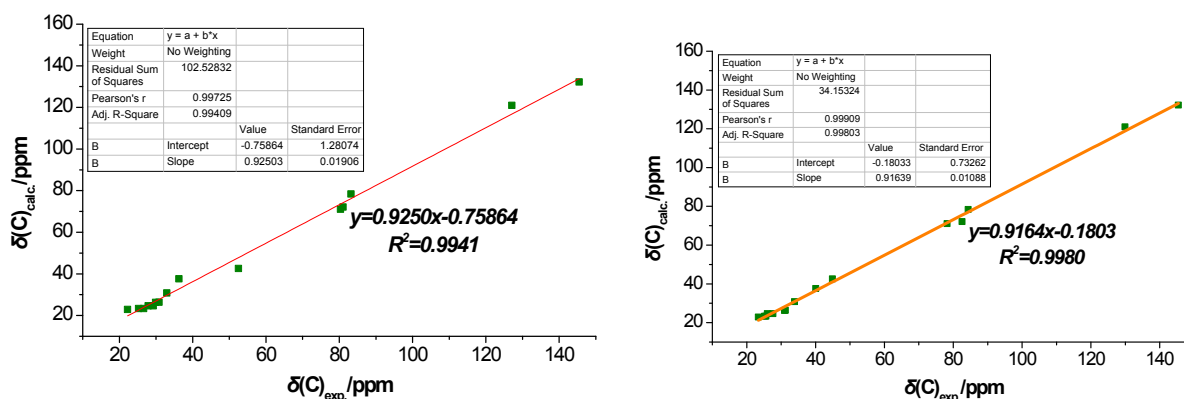

SI-figure-7. Correlation between experimental and calculated  $^{13}\text{C}$  chemical shifts of stereoisomers (2R/5S/6R left, 2R/5S/6S right) of **4a**

- (1) Barone, G.; Gomez-Paloma, L.; Duca, D.; Silvestri, A.; Riccio, R.; Bifulco, G. *Chem. Eur. J.* **2002**, *8*, 3233–3239.
- (2) Tang, Y.; Xue, Y. B.; Du, G.; Wang, J. P.; Liu, J. J.; Sun, B.; Li, X. N.; Yao, G. M.; Luo, Z. W.; Zhang, Y. H. *Angew. Chem. Int. Ed.* **2016**, *55*, 4069–4073.
- (3) Barone, G.; Duca, D.; Silvestri, A.; Gomez-Paloma, L.; Riccio, R.; Bifulco, G. *Chem. Eur. J.* **2002**, *8*, 3240–3245.

**SI-E.6. Evaluation of Antiplatelet Activity in Rat PRP.**

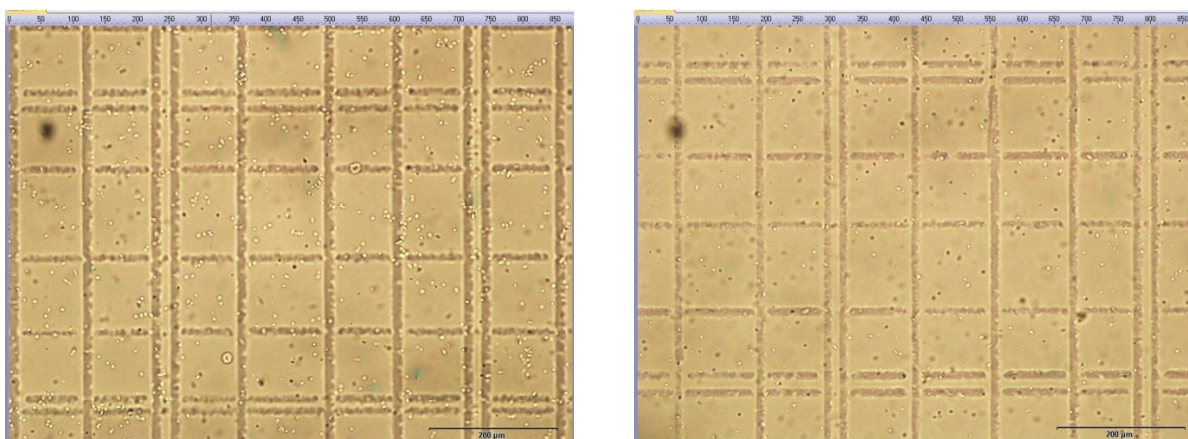

SI-figure-8. The platelet the aggregation model induced by adenosine diphosphate (ADP)

**SI-E.7. Antithrombotic assay using a transgenic zebrafish system**

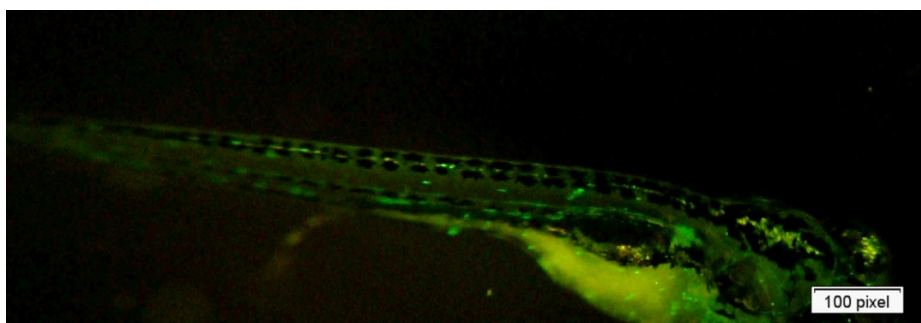

SI-figure-9. The  $\text{FeCl}_3$ -induced thrombosis model in the transgenic zebrafish system

SI-table 1. Conformations of 1a were Obtained after the Optimization.

| 1a   |                                                                                     |                | 1b    |                                                                                      |                |
|------|-------------------------------------------------------------------------------------|----------------|-------|--------------------------------------------------------------------------------------|----------------|
| no.  | conformer                                                                           | population (%) | no.   | conformer                                                                            | population (%) |
| 1a-1 | 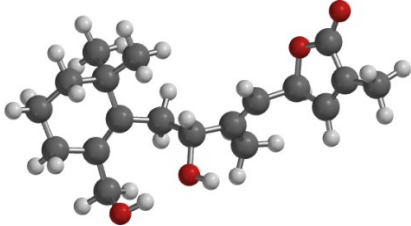   | 40.8           | 1a-7  |    | 0.8            |
| 1a-2 |   | 28.1           | 1a-8  |   | 0.6            |
| 1a-3 |  | 12.9           | 1a-9  |  | 0.4            |
| 1a-4 |  | 9.8            | 1a-10 |  | 0.3            |
| 1a-5 |  | 3.3            | 1a-11 |  | 0.3            |

|      |                                                                                   |     |       |                                                                                    |     |
|------|-----------------------------------------------------------------------------------|-----|-------|------------------------------------------------------------------------------------|-----|
| 1a-6 | 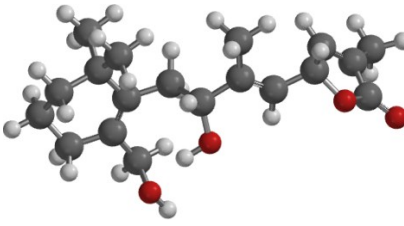 | 1.0 | 1a-12 |  | 0.3 |
|------|-----------------------------------------------------------------------------------|-----|-------|------------------------------------------------------------------------------------|-----|

SI-table 2. Conformations of 2a were obtained after the optimization.

| 2a   | 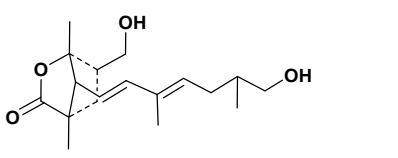   |                | 2b    |    |                |
|------|-------------------------------------------------------------------------------------|----------------|-------|--------------------------------------------------------------------------------------|----------------|
| no.  | conformer                                                                           | population (%) | no.   | conformer                                                                            | population (%) |
| 2a-1 |    | 20.9           | 2a-16 |    | 0.9            |
| 2a-2 |   | 18.4           | 2a-17 |   | 0.7            |
| 2a-3 |  | 12.0           | 2a-18 |  | 0.7            |
| 2a-4 |  | 8.7            | 2a-19 |  | 0.6            |
| 2a-5 |  | 7.8            | 2a-20 |  | 0.6            |

|       |                                                                                     |     |       |                                                                                      |     |
|-------|-------------------------------------------------------------------------------------|-----|-------|--------------------------------------------------------------------------------------|-----|
| 2a-6  | 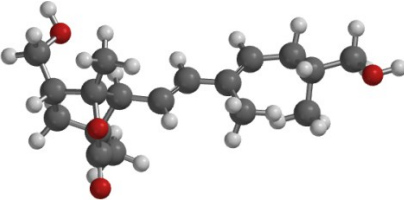   | 6.7 | 2a-21 |    | 0.6 |
| 2a-7  |    | 1.8 | 2a-22 |    | 0.6 |
| 2a-8  |    | 1.6 | 2a-23 |    | 0.5 |
| 2a-9  |   | 1.6 | 2a-24 |   | 0.5 |
| 2a-10 |  | 1.4 | 2a-25 |  | 0.5 |
| 2a-11 |  | 1.4 | 2a-26 |  | 0.4 |

|       |                                                                                     |     |       |                                                                                      |     |
|-------|-------------------------------------------------------------------------------------|-----|-------|--------------------------------------------------------------------------------------|-----|
| 2a-12 | 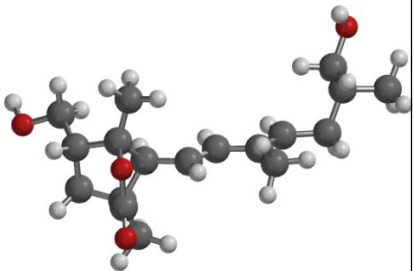   | 1.2 | 2a-27 |    | 0.4 |
| 2a-13 |    | 1.1 | 2a-28 |    | 0.4 |
| 2a-14 |   | 1.1 | 2a-29 |   | 0.4 |
| 2a-15 |  | 0.9 | 2a-30 |  | 0.3 |

SI-table 3 Deviations between the calculated and experimental  $^{13}\text{C}$  NMR chemical shifts for stereoisomers (2*S*, 2*R*) of **2**

| EXL   | 2 <i>S</i> |            |                |                  | 2 <i>R</i> |            |                |                  |
|-------|------------|------------|----------------|------------------|------------|------------|----------------|------------------|
|       | calc.      | scal.calc. | $\Delta\delta$ | $ \Delta\delta $ | calc.      | scal.calc. | $\Delta\delta$ | $ \Delta\delta $ |
| 12.7  | 13.4       | 12.0       | 0.7            | 0.7              | 13.8       | 11.9       | 0.8            | 0.8              |
| 19.5  | 14.2       | 12.8       | 6.7            | 6.7              | 14.4       | 12.4       | 7.1            | 7.1              |
| 22.5  | 16.2       | 14.6       | 7.9            | 7.9              | 17.7       | 15.5       | 7.0            | 7.0              |
| 23.8  | 18.3       | 16.6       | 7.2            | 7.2              | 19.9       | 17.6       | 6.2            | 6.2              |
| 24    | 36.3       | 33.3       | -9.3           | 9.3              | 35.7       | 32.3       | -8.3           | 8.3              |
| 37.1  | 39.0       | 35.8       | 1.3            | 1.3              | 39.0       | 35.5       | 1.6            | 1.6              |
| 37.1  | 41.3       | 37.9       | -0.8           | 0.8              | 42.1       | 38.3       | -1.2           | 1.2              |
| 38.6  | 54.7       | 50.4       | -11.8          | 11.8             | 56.6       | 51.9       | -13.3          | 13.3             |
| 46.7  | 58.0       | 53.5       | -6.8           | 6.8              | 58.5       | 53.6       | -6.9           | 6.9              |
| 58.2  | 67.4       | 62.2       | -4.0           | 4.0              | 66.8       | 61.4       | -3.2           | 3.2              |
| 61.9  | 68.4       | 63.2       | -1.3           | 1.3              | 68.3       | 62.7       | -0.8           | 0.8              |
| 64.6  | 69.3       | 64.0       | 0.6            | 0.6              | 70.3       | 64.6       | 0.0            | 0.0              |
| 70.8  | 76.1       | 70.3       | 0.5            | 0.5              | 75.7       | 69.7       | 1.1            | 1.1              |
| 74.3  | 79.7       | 73.7       | 0.6            | 0.6              | 78.3       | 72.2       | 2.1            | 2.1              |
| 75.3  | 80.1       | 74.1       | 1.2            | 1.2              | 80.3       | 74.0       | 1.3            | 1.3              |
| 77.5  | 80.9       | 74.8       | 2.7            | 2.7              | 80.9       | 74.6       | 2.9            | 2.9              |
| 77.5  | 82.1       | 75.9       | 1.6            | 1.6              | 82.3       | 75.8       | 1.7            | 1.7              |
| 86    | 101.8      | 94.3       | -8.3           | 8.3              | 102.3      | 94.5       | -8.5           | 8.5              |
| 103.4 | 109.3      | 101.2      | 2.2            | 2.2              | 109.2      | 101.0      | 2.4            | 2.4              |
| 118.8 | 128.2      | 118.8      | 0.0            | 0.0              | 127.7      | 118.3      | 0.5            | 0.5              |
| 133.6 | 141.0      | 130.7      | 2.9            | 2.9              | 140.6      | 130.3      | 3.3            | 3.3              |
| 134.4 | 145.0      | 134.4      | 0.0            | 0.0              | 145.9      | 135.3      | -0.9           | 0.9              |
| 141.7 | 148.0      | 137.3      | 4.4            | 4.4              | 148.9      | 138.1      | 3.6            | 3.6              |
| 179.5 | 191.7      | 177.9      | 1.6            | 1.6              | 191.7      | 178.0      | 1.5            | 1.5              |
|       |            |            | AveDev         | 3.5              |            |            | AveDev         | 3.6              |
|       |            |            | MaxDev         | 11.8             |            |            | MaxDev         | 13.3             |
|       |            |            | R <sup>2</sup> | 0.9875           |            |            | R <sup>2</sup> | 0.9875           |

SI-table 4 Deviations between the calculated and experimental  $^{13}\text{C}$  NMR chemical shifts for stereoisomers (*2R/5R/6R*, *2R/5R/6S*) of **4a**

| EXL   |       | <i>2R/5R/6R</i> |                |                  |       | <i>2R/5R/6S</i> |                |                  |
|-------|-------|-----------------|----------------|------------------|-------|-----------------|----------------|------------------|
|       | calc. | scal.calc.      | $\Delta\delta$ | $ \Delta\delta $ | calc. | scal.calc.      | $\Delta\delta$ | $ \Delta\delta $ |
| 22.9  | 21.1  | 18.9            | -4.0           | 4.0              | 23.2  | 21.0            | -1.9           | 1.9              |
| 23.3  | 23.8  | 21.5            | -1.8           | 1.8              | 24.9  | 22.5            | -0.8           | 0.8              |
| 23.3  | 25.9  | 23.4            | 0.1            | 0.1              | 25.9  | 23.4            | 0.1            | 0.1              |
| 24.6  | 26.8  | 24.3            | -0.3           | 0.3              | 27.2  | 24.6            | 0.0            | 0.0              |
| 24.6  | 27.7  | 25.1            | 0.5            | 0.5              | 28.3  | 25.6            | 1.0            | 1.0              |
| 26.3  | 29.3  | 26.5            | 0.2            | 0.2              | 29.8  | 27.1            | 0.8            | 0.8              |
| 26.4  | 30.7  | 27.9            | 1.5            | 1.5              | 30.9  | 28.1            | 1.7            | 1.7              |
| 30.8  | 35.2  | 32.0            | 1.2            | 1.2              | 34.1  | 31.0            | 0.2            | 0.2              |
| 37.6  | 41.6  | 37.9            | 0.3            | 0.3              | 37.2  | 33.9            | -3.7           | 3.7              |
| 42.6  | 50.1  | 45.7            | 3.1            | 3.1              | 49.2  | 45.0            | 2.4            | 2.4              |
| 71.1  | 78.5  | 71.9            | 0.8            | 0.8              | 78.0  | 71.5            | 0.4            | 0.4              |
| 72.1  | 80.8  | 74.0            | 1.9            | 1.9              | 81.2  | 74.5            | 2.4            | 2.4              |
| 78.4  | 83.9  | 76.9            | -1.5           | 1.5              | 84.2  | 77.2            | -1.2           | 1.2              |
| 121.0 | 129.0 | 118.5           | -2.5           | 2.5              | 128.5 | 118.1           | -2.9           | 2.9              |
| 132.2 | 144.6 | 132.9           | 0.7            | 0.7              | 145.4 | 133.7           | 1.5            | 1.5              |
|       |       |                 | AveDev         | 1.3              |       |                 | AveDev         | 1.4              |
|       |       |                 | MaxDev         | 4.0              |       |                 | MaxDev         | 3.7              |
|       |       |                 | R <sup>2</sup> | 0.9973           |       |                 | R <sup>2</sup> | 0.9973           |



SI-table 5. Deviations between the calculated and experimental  $^{13}\text{C}$  NMR chemical shifts for stereoisomers (*2R/5S/6R*, *2R/5S/6S*) of **4a**

| EXL   | <i>2R/5S/6R</i> |            |                |                  | <i>2R/5S/6S</i> |            |                |                  |
|-------|-----------------|------------|----------------|------------------|-----------------|------------|----------------|------------------|
|       | calc.           | scal.calc. | $\Delta\delta$ | $ \Delta\delta $ | calc.           | scal.calc. | $\Delta\delta$ | $ \Delta\delta $ |
| 22.9  | 22.3            | 19.8       | -3.1           | 3.1              | 23.4            | 21.2       | -1.7           | 1.7              |
| 23.3  | 25.3            | 22.6       | -0.7           | 0.7              | 25.2            | 22.9       | -0.4           | 0.4              |
| 23.3  | 26.6            | 23.9       | 0.6            | 0.6              | 25.6            | 23.3       | 0.0            | 0.0              |
| 24.6  | 27.9            | 25.0       | 0.4            | 0.4              | 26.0            | 23.6       | -1.0           | 1.0              |
| 24.6  | 29.3            | 26.3       | 1.7            | 1.7              | 27.6            | 25.1       | 0.5            | 0.5              |
| 26.3  | 29.9            | 26.9       | 0.6            | 0.6              | 31.0            | 28.2       | 1.9            | 1.9              |
| 26.4  | 30.8            | 27.8       | 1.4            | 1.4              | 31.2            | 28.4       | 2.0            | 2.0              |
| 30.8  | 32.9            | 29.7       | -1.1           | 1.1              | 33.9            | 30.9       | 0.1            | 0.1              |
| 37.6  | 36.3            | 32.8       | -4.8           | 4.8              | 40.1            | 36.5       | -1.1           | 1.1              |
| 42.6  | 52.5            | 47.8       | 5.2            | 5.2              | 44.9            | 41.0       | -1.6           | 1.6              |
| 71.1  | 80.3            | 73.6       | 2.5            | 2.5              | 78.2            | 71.5       | 0.4            | 0.4              |
| 72.1  | 81.1            | 74.2       | 2.1            | 2.1              | 82.6            | 75.5       | 3.4            | 3.4              |
| 78.4  | 83.2            | 76.2       | -2.2           | 2.2              | 84.4            | 77.1       | -1.3           | 1.3              |
| 121.0 | 127.1           | 116.8      | -4.2           | 4.2              | 129.9           | 118.9      | -2.1           | 2.1              |
| 132.2 | 145.5           | 133.8      | 1.6            | 1.6              | 145.4           | 133.1      | 0.9            | 0.9              |
|       |                 |            | AveDev         | 2.1              |                 |            | AveDev         | 1.2              |
|       |                 |            | MaxDev         | 5.2              |                 |            | MaxDev         | 3.4              |
|       |                 |            | R <sup>2</sup> | 0.9941           |                 |            | R <sup>2</sup> | 0.9980           |

SI-table 6. Calculated Boltzmann distributions and optical rotations for each conformer of **4** and **3**

| <b>Compound 4 (2R,5S,6S)</b> |                  |                        | <b>Compound 3 (2R,5R,6S)</b> |                  |                        |
|------------------------------|------------------|------------------------|------------------------------|------------------|------------------------|
| Conformer                    | Optical rotation | Boltzmann distribution | Conformer                    | Optical rotation | Boltzmann distribution |
| 1                            | -18.13           | 0.602                  | 1                            | -18.13           | 0.602                  |
| 2                            | -25              | 0.329                  | 2                            | -25              | 0.329                  |
| 3                            | 10.07            | 0.011                  | 3                            | 10.07            | 0.011                  |
| 4                            | -37.48           | 0.01                   | 4                            | -37.48           | 0.01                   |
| 5                            | -52.23           | 0.008                  | 5                            | -52.23           | 0.008                  |
| 6                            | -8.89            | 0.006                  | 6                            | -8.89            | 0.006                  |
| 7                            | -55.86           | 0.006                  | 7                            | -55.86           | 0.006                  |
| 8                            | -6.5             | 0.005                  | 8                            | -6.5             | 0.005                  |
| 9                            | -45.14           | 0.004                  | 9                            | -45.14           | 0.004                  |
| 10                           | -73.72           | 0.004                  | 10                           | -73.72           | 0.004                  |
| 11                           | -123.89          | 0.003                  | 11                           | -123.89          | 0.003                  |
| 12                           | -102.1           | 0.002                  |                              |                  |                        |
| 13                           | -81.32           | 0.002                  |                              |                  |                        |
| 14                           | -20.78           | 0.002                  |                              |                  |                        |
| 15                           | -46.69           | 0.001                  |                              |                  |                        |
| 16                           | -3.19            | 0.001                  |                              |                  |                        |
| 17                           | -52.75           | 0.001                  |                              |                  |                        |
| 18                           | -31.32           | 0.001                  |                              |                  |                        |
| 19                           | -88.4            | 0.001                  |                              |                  |                        |
| 20                           | -0.42            | 0.001                  |                              |                  |                        |
| 21                           | -51.66           | 0.001                  |                              |                  |                        |
| Weighted optical rotation    | <b>-21.77</b>    |                        | Weighted optical rotation    | <b>-8.68</b>     |                        |

# Spectra figure

## S1. <sup>1</sup>H NMR spectrum (600MHz, DMSO-d<sub>6</sub>) of compound 1

AV-600-1H  
Sample:

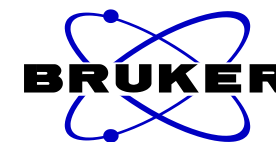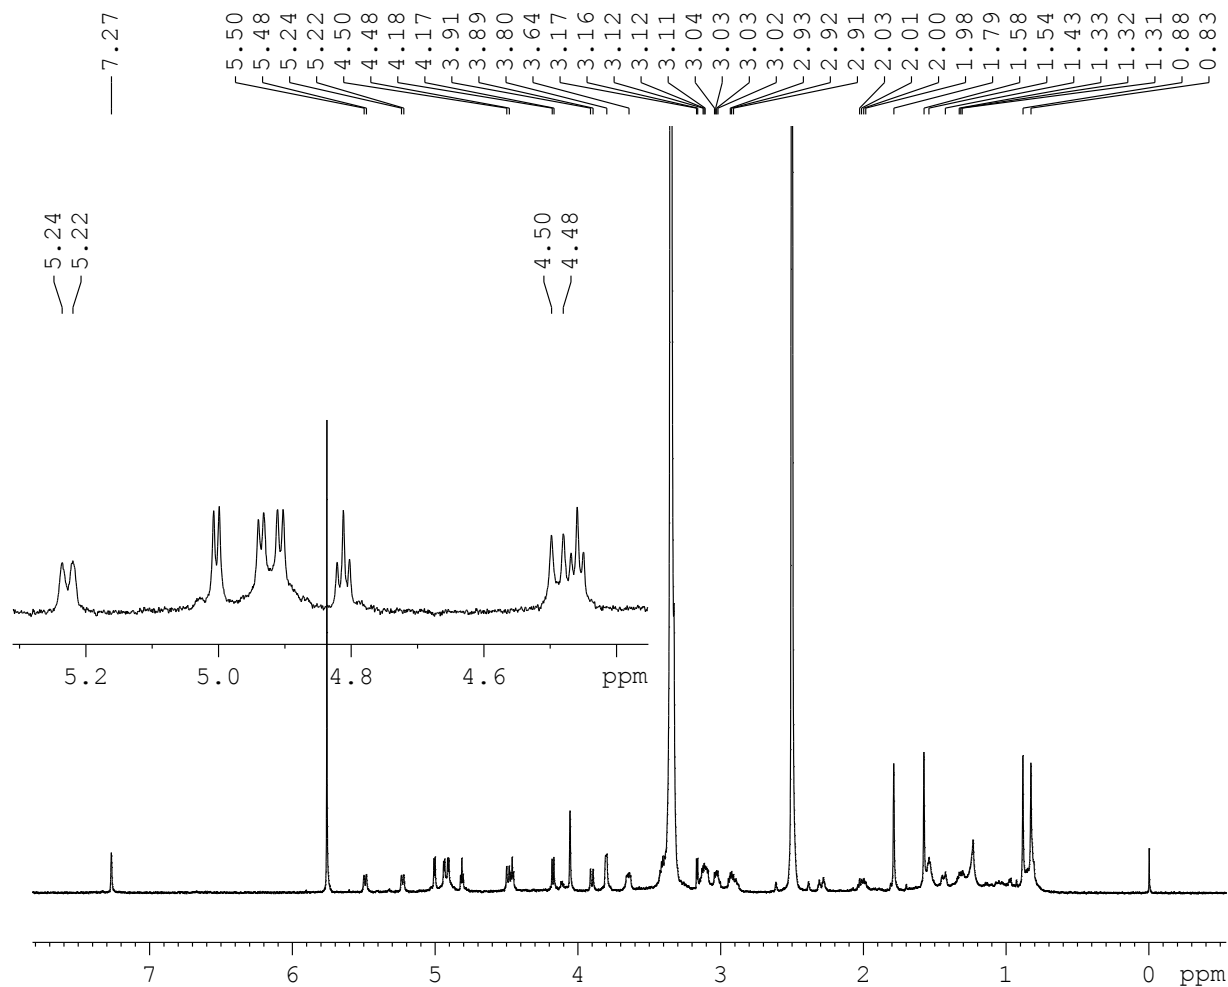

```

NAME          CP2-49
EXPNO         3
PROCNO        1
Date_         20170116
Time          14.03
INSTRUM       spect
PROBHD        5 mm PABBO BB-
PULPROG       zg30
TD            65536
SOLVENT       DMSO
NS            8
DS            0
SWH           12019.230 Hz
FIDRES        0.183399 Hz
AQ            2.7263892 sec
RG            406
DW            41.600 usec
DE            6.50 usec
TE            294.3 K
D1            1.00000000 sec
TD0           1

===== CHANNEL f1 =====
NUC1          1H
P1            11.10 usec
PL1           -4.00 dB
PL1W          34.70265579 W
SFO1          600.1328206 MHz
SI            32768
SF            600.1300006 MHz
WDW           EM
SSB           0
LB            0.30 Hz
GB            0
PC            1.00
    
```

S2. <sup>13</sup>C NMR spectrum (150MHz, DMSO-*d*<sub>6</sub>) of compound 1

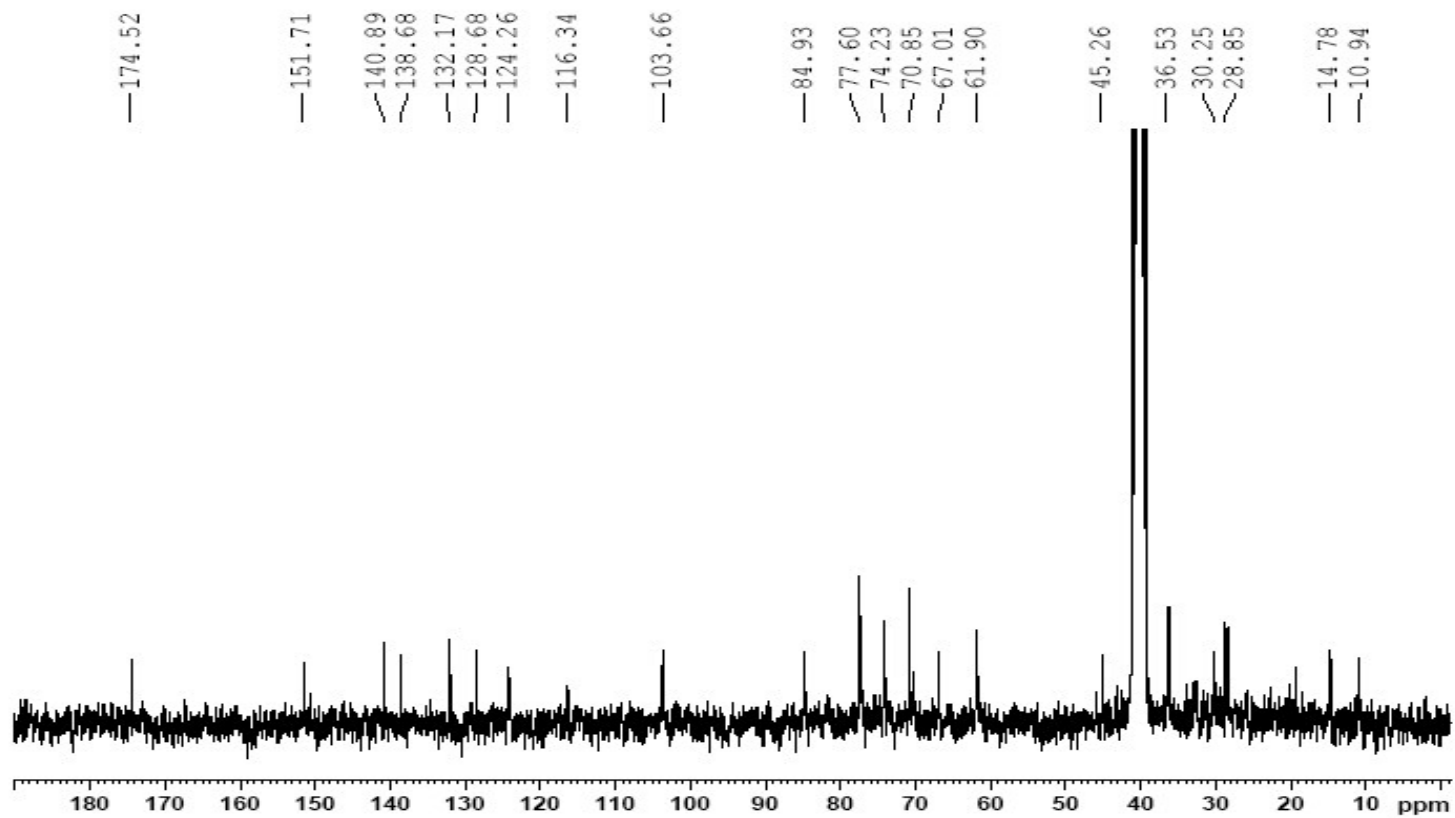

### S3. HSQC spectrum (600MHz, DMSO-d6) of compound 1

AV-600-HSQC  
Sample:

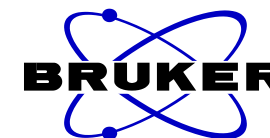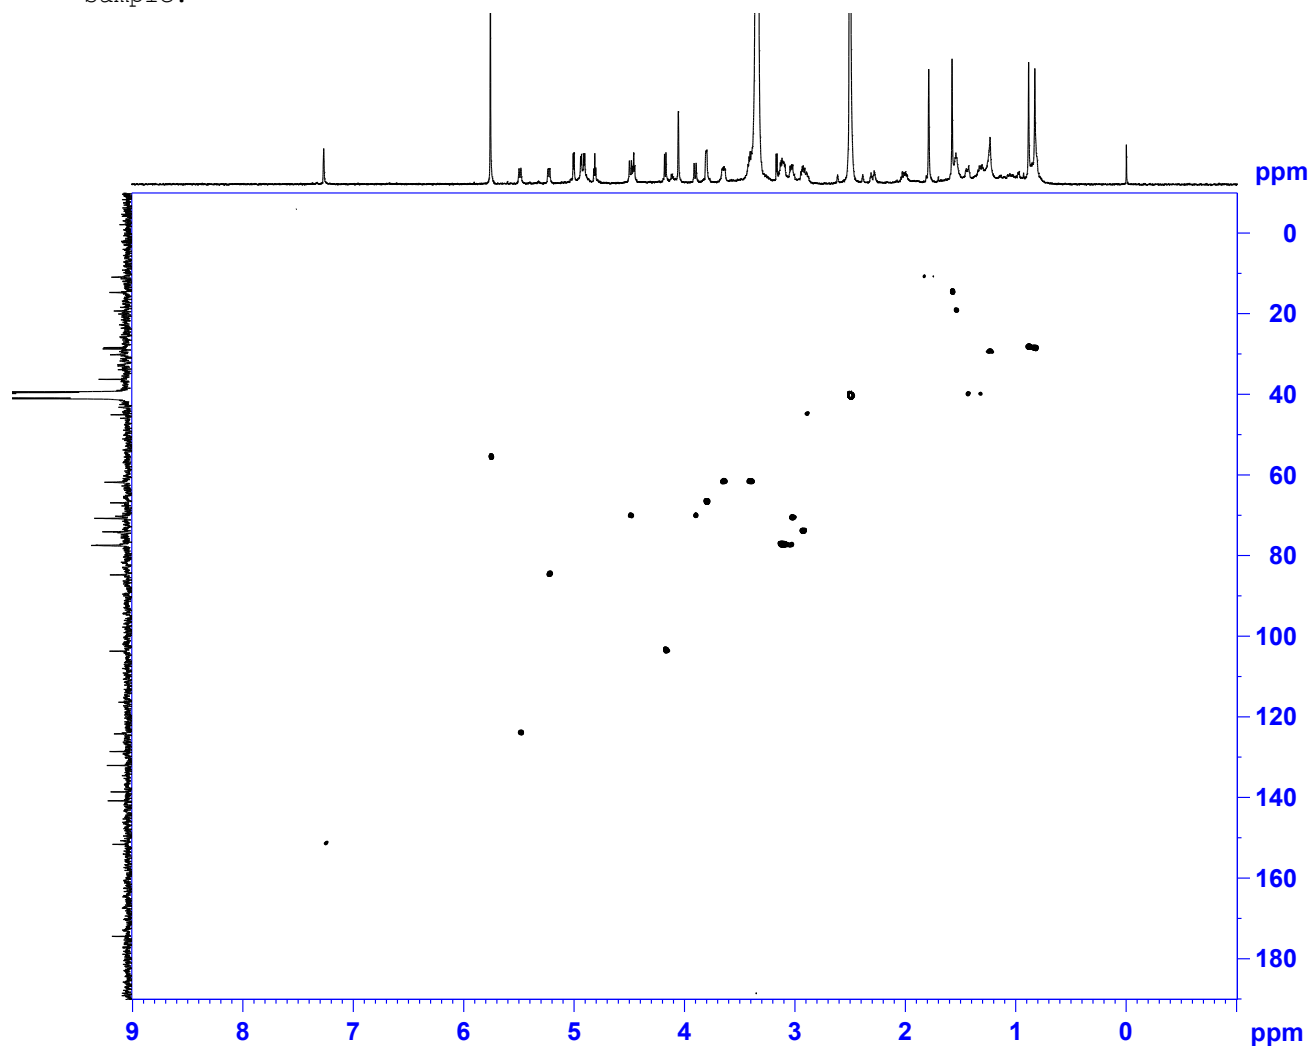

```

NAME          CP2-49
EXPNO         8
PROCNO        1
Date_         20170116
Time         14.05
INSTRUM       spect
PROBHD        5 mm PABBO BB-
PULPROG       hsqcetgpsi
TD            1024
SOLVENT       DMSO
NS            8
DS            16
SWH           6009.615 Hz
FIDRES        5.868765 Hz
AQ            0.0853300 sec
RG            29100
DW            83.200 usec
DE            6.50 usec
TE            294.3 K
CNST2         145.0000000
D0            0.00000300 sec
D1            1.50000000 sec
D4            0.00172414 sec
D11           0.03000000 sec
D13           0.00000400 sec
D16           0.00020000 sec
D24           0.00110000 sec
IN0           0.00001655 sec
ZGOPTNS

===== CHANNEL f1 =====
NUC1          1H
P1            11.10 usec
P2            22.20 usec
P28           2500.00 usec
PL1           -4.00 dB
PL1W          34.70265579 W
SFO1          600.1324005 MHz

===== CHANNEL f2 =====
CPDPRG2       garp
NUC2          13C
P3            9.53 usec
P4            19.06 usec
PCPD2         80.00 usec
PL2           1.00 dB
PL12          19.48 dB
PL2W          83.20243835 W
PL12W         1.18069065 W
SFO2          150.9163903 MHz

===== GRADIENT CHANNEL =====
GPNAM1        SINE.100
GPNAM2        SINE.100
GPZ1          80.00 %
GPZ2          20.10 %
F16           1000.00 usec
ND0           2
TD            225
SFO1          150.9164 MHz
FIDRES        134.147903 Hz
SW            200.000 ppm
FrMODE        Echo-Antiecho
SI            1024
SF            600.1300000 MHz
WDW           QSINE
SSB           2
LB            0.00 Hz
GB            0
PC            1.40
SI            1024
MC2           echo-antiecho
SF            150.9027963 MHz
WDW           QSINE
SSB           2
LB            0.00 Hz
GB            0
    
```

### S4.HMBC spectrum (600MHz, DMSO-d6) of compound 1

AV-600-HMBC  
Sample:

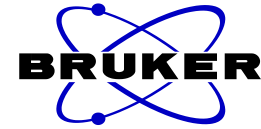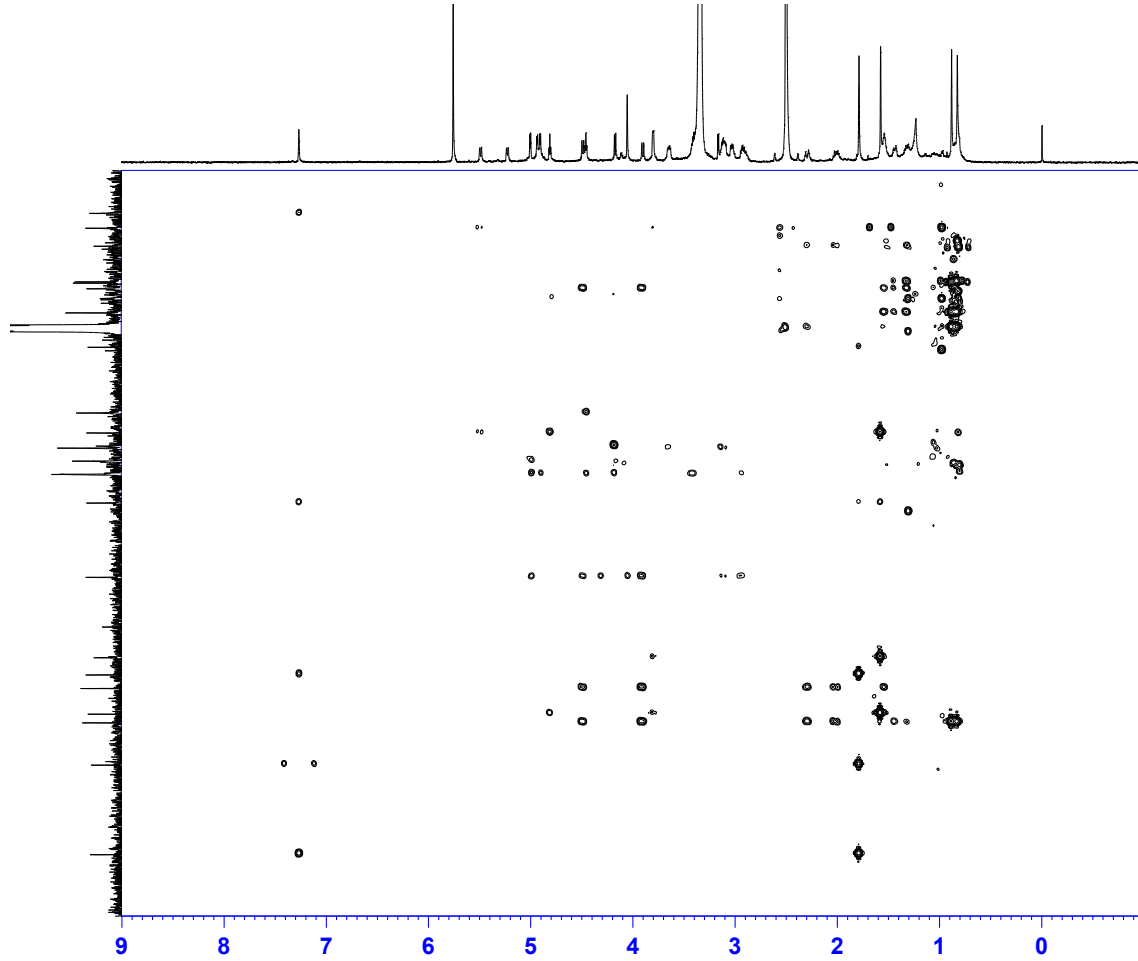

```

NAME          CP2-49
EXPNO         9
PROCNO        1
Date_         20101013
Time_         17.31
INSTRUM       spect
PROBHD        5 mm FABBBO BB-
PULPROG       hmbc91pndcf
TD            1024
SOLVENT       DMSO
NS            32
DS            16
SWH           6009.615 Hz
FIDRES        5.868765 Hz
AQ            0.0853300 sec
RG            29100
DW            83.200 usec
DE            6.50 usec
TE            298.2 K
CNST2         145.0000000
CNST13        5.0000000
D0            0.00000300 sec
D1            1.50000000 sec
D2            0.00344828 sec
D6            0.10000000 sec
D16           0.00020000 sec
IN0           0.00001655 sec

===== CHANNEL f1 =====
NUC1          1H
P1            11.10 usec
P2            22.20 usec
PL1           -4.00 dB
PL1W          34.70265579 W
SFO1          600.1324005 MHz

===== CHANNEL f2 =====
NUC2          13C
P3            8.80 usec
P2            1.00 dB
PL2W          83.20243835 W
SFO2          150.9178993 MHz

===== GRADIENT CHANNEL =====
GPNAM1        SINE.100
GPNAM2        SINE.100
GPNAM3        SINE.100
GPZ1          50.00 %
GPZ2          30.00 %
GPZ3          40.10 %
PI6           1000.00 usec
ND0           2
TD            256
SFO1          150.9179 MHz
FIDRES        117.904610 Hz
SW            200.000 ppm
FhMODE        QF
SI            1024
SF            600.1299914 MHz
WDM           SINE
SSB           0
LB            0.00 Hz
GB            0
PC            1.40
SI            1024
MC2           QF
SF            150.9028118 MHz
WDM           SINE
SSB           0
LB            0.00 Hz
SB            0
    
```

S5. NOESY spectrum (600MHz, DMSO-*d*<sub>6</sub>) of compound 1

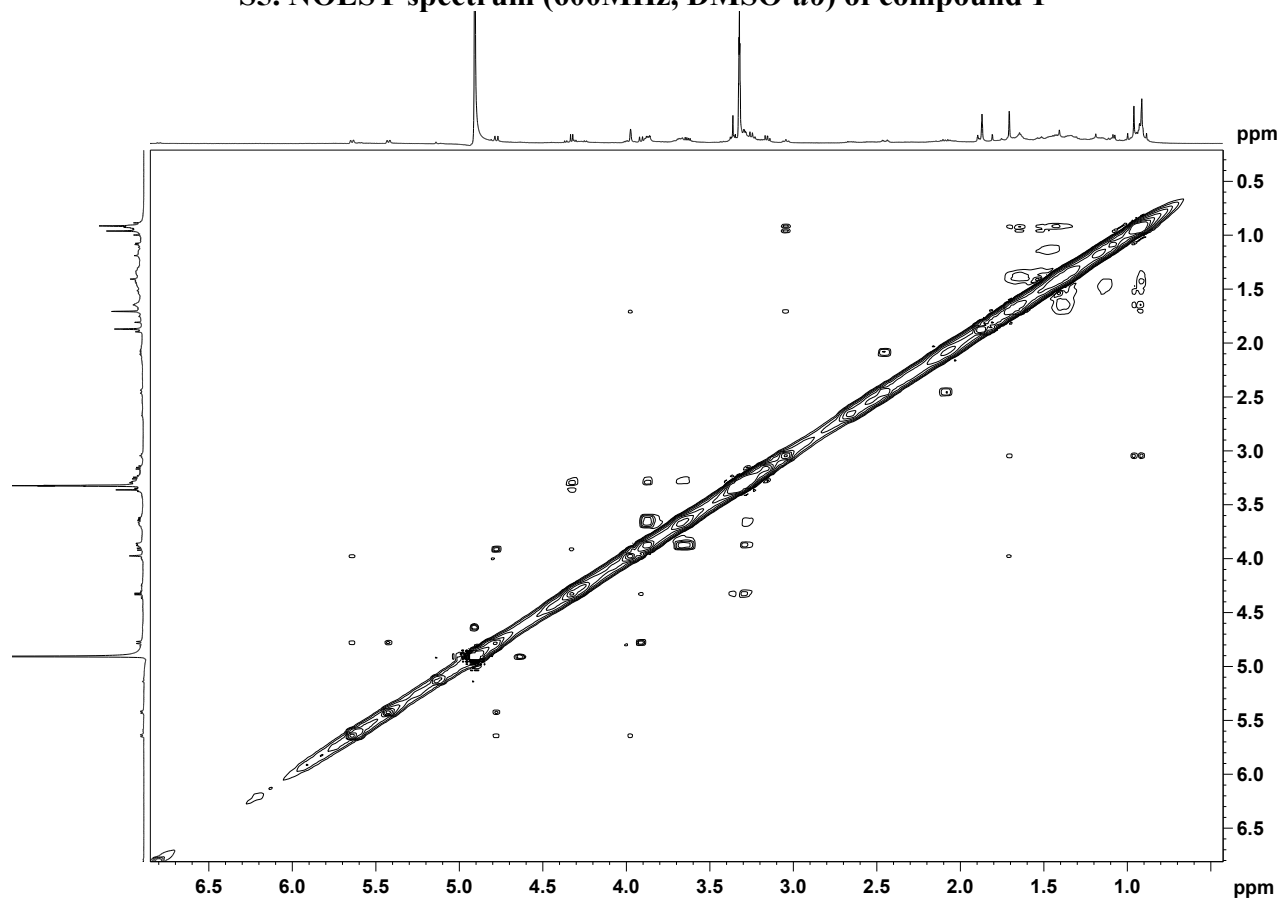

## Mass Spectrum Molecular Formula Report

**Analysis Info**  
 Acquisition Date 1/7/2011 5:12:44 PM  
 Analysis Name D:\Data\20110107\YE-49.d  
 Method Tune low 100-500.m  
 Sample Name YE-49  
 Comment Instrument / Ser# micrOTOF-Q 125  
 Operator Bruker Customer

**Acquisition Parameter**  
 Source Type ESI  
 Focus Active  
 Scan Begin 500 m/z  
 Scan End 3000 m/z  
 Ion Polarity Positive  
 Set Capillary 4500 V  
 Set Exit Plate Offset -500 V  
 Set Collision Cell RF 90.0 Vpp  
 Set Nebulizer 0.4 Bar  
 Set Dry Heater 180 °C  
 Set Dry Gas 4.0 l/min  
 Set Divert Valve Source

**Generate Molecular Formula Parameter**

Formula, min. C25H38O9  
 Formula, max.  
 Measured m/z 483.258  
 Check Valence no  
 Nitrogen Rule no  
 Filter H/C Ratio no  
 Estimate Carbon yes  
 Tolerance 3 ppm  
 Minimum 0  
 Electron Configuration both  
 Minimum 0  
 Maximum 3  
 Charge 1  
 Maximum 0

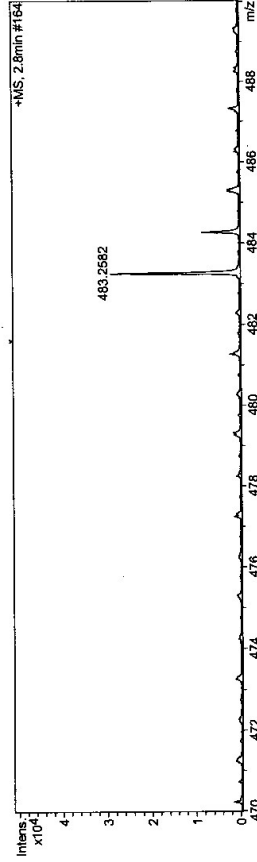

| # | m/z      | I     |
|---|----------|-------|
| 1 | 483.2582 | 28825 |

  

| Sum Formula | Sigma | m/z      | Err [ppm] | Mean Err [ppm] | Err [mDa] | rdB  | N Rule | e-   |
|-------------|-------|----------|-----------|----------------|-----------|------|--------|------|
| C25H38O9    | 0.019 | 483.2589 | 1.39      | -0.02          | 0.67      | 6.50 | ok     | even |



S7. <sup>1</sup>H NMR spectrum (600MHz, DMSO-*d*<sub>6</sub>) of compound 2

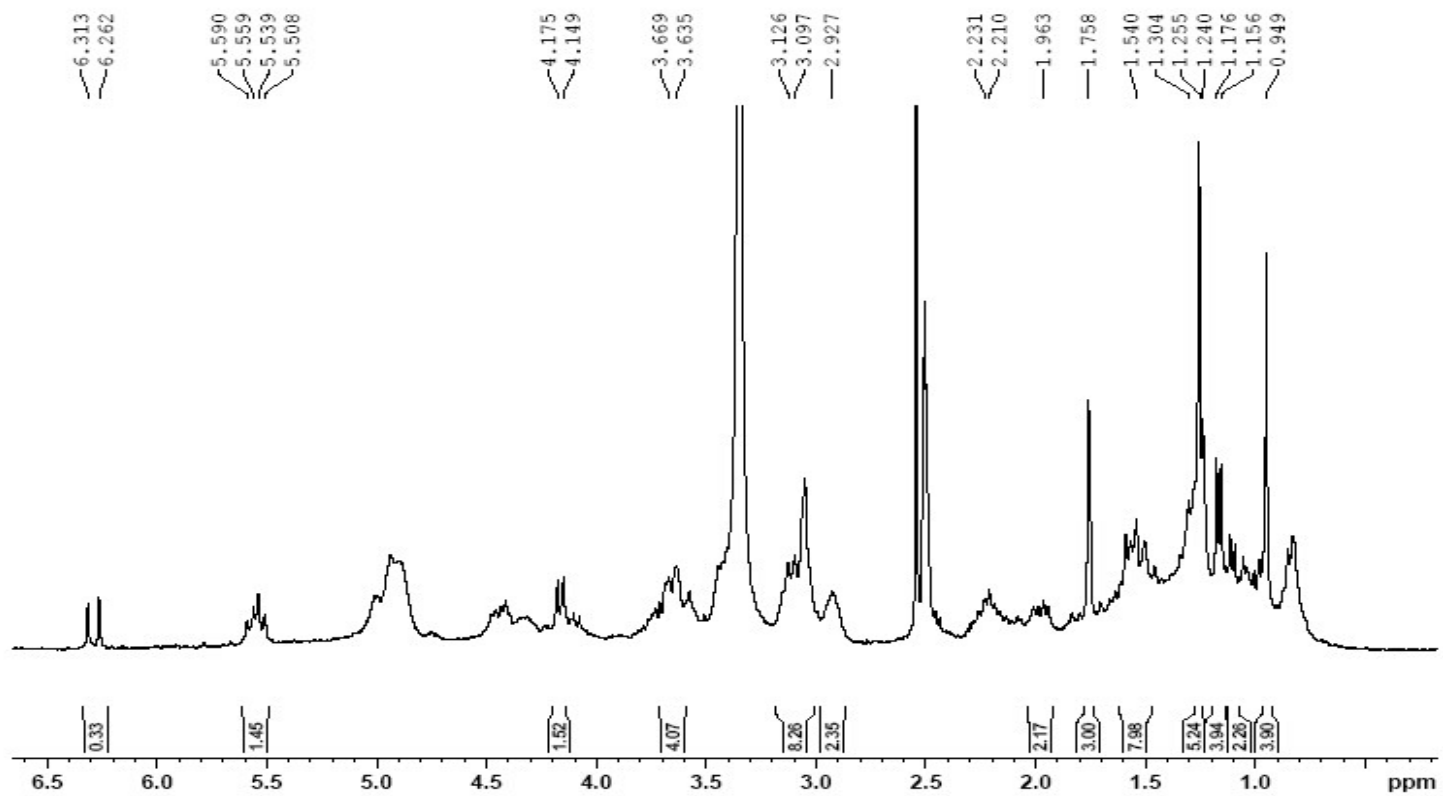

S8.  $^{13}\text{C}$  NMR spectrum (150MHz, DMSO-*d*<sub>6</sub>) of compound 2

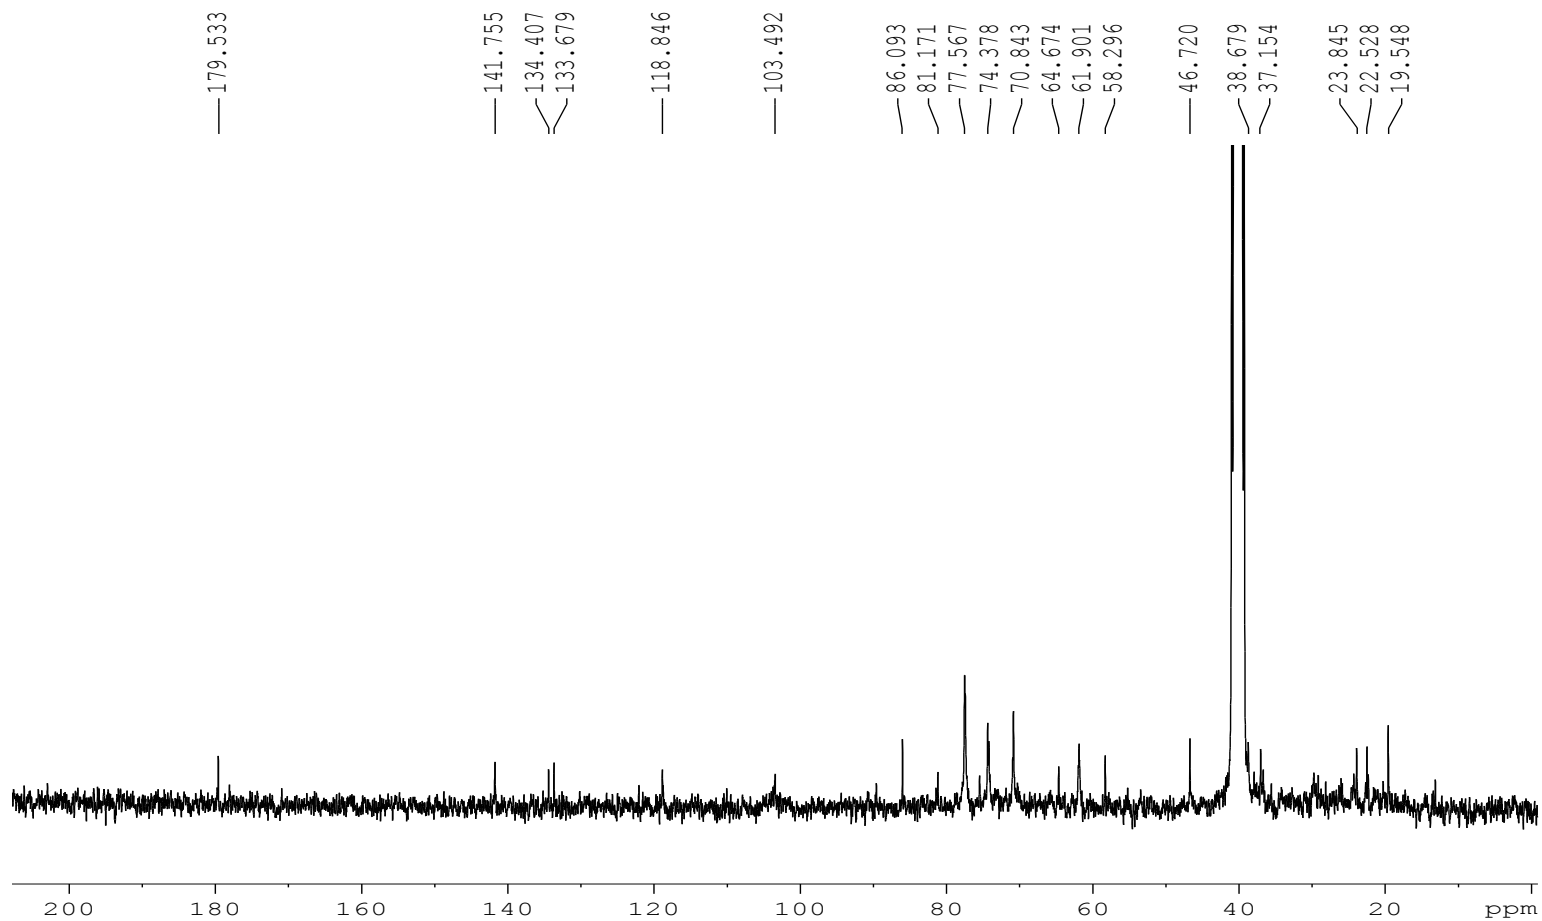

### S9. HSQC spectrum (600MHz, DMSO-d6) of compound 2

AV-600-HSQC  
Sample:

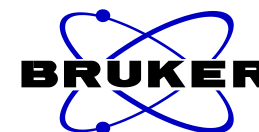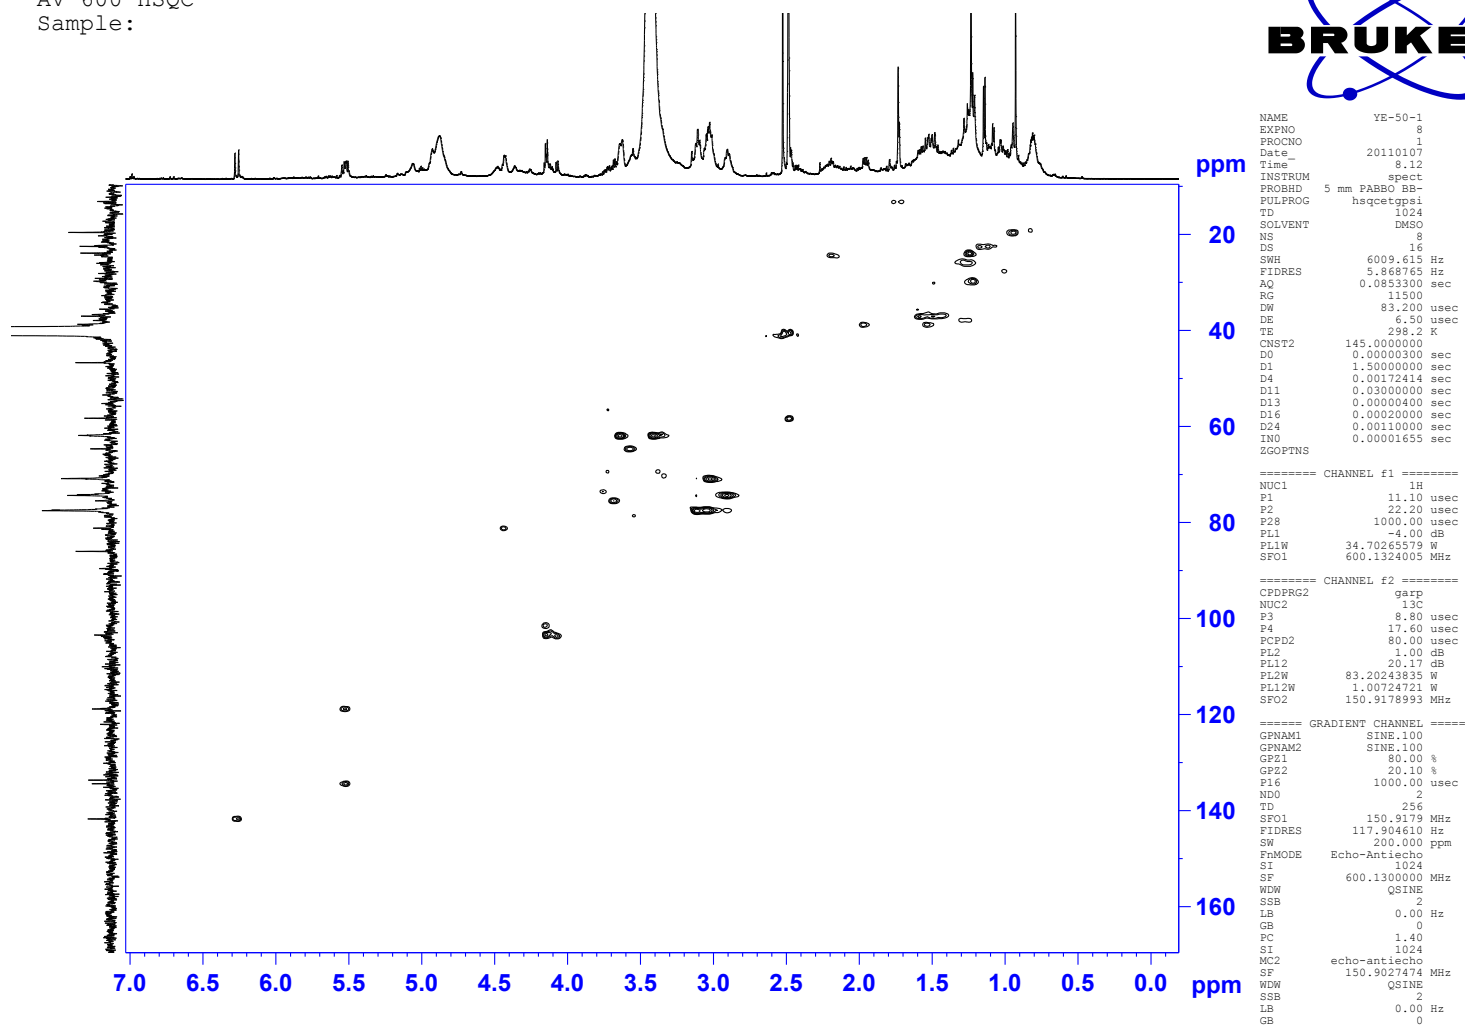

```

NAME VE-50-1
EXPNO 8
PROCNO 1
Date_ 20110107
Time 8.12
INSTRUM spect
PROBHD 5 mm PABBO BB-
PULPROG hsqcetgps1
TD 1024
SOLVENT DMSO
NS 8
DS 16
SWH 6009.615 Hz
FIDRES 5.868765 Hz
AQ 0.0853300 sec
RG 11500
DW 83.200 usec
DE 6.50 usec
TE 298.2 K
CNST2 145.0000000
D0 0.0000000 sec
D1 1.5000000 sec
D4 0.00172414 sec
D11 0.03000000 sec
D13 0.00000400 sec
D16 0.00020000 sec
D24 0.00110000 sec
INO 0.00001655 sec
ZGPTNS

===== CHANNEL f1 =====
NUC1 1H
P1 11.10 usec
P2 22.20 usec
P28 1000.00 usec
PL1 -4.00 dB
PL1W 34.70265979 W
SFO1 600.1324005 MHz

===== CHANNEL f2 =====
CPDPRG2 gprp
NUC2 13C
P3 8.80 usec
P4 17.60 usec
PCPD2 80.00 usec
PL2 1.00 dB
PL12 20.17 dB
PL2W 83.20243835 W
PL12W 1.00724721 W
SFO2 150.9178993 MHz

===== GRADIENT CHANNEL =====
GPNAM1 SINE.100
GPNAM2 SINE.100
GP21 80.00 %
GP22 20.10 %
P16 1000.00 usec
ND0 2
TD 256
SFO1 150.9179 MHz
FIDRES 117.904610 Hz
SW 200.000 ppm
FnMODE Echo-Antiecho
SI 1024
SF 600.1300000 MHz
WDW QSINE
SSB 2
LB 0.00 Hz
GB 0
PC 1.40
SI 1024
MC2 echo-antiecho
SF 150.907474 MHz
WDW QSINE
SSB 2
LB 0.00 Hz
GB 0
    
```

S10. HMBC spectrum (600MHz, DMSO-*d*<sub>6</sub>) of compound 2

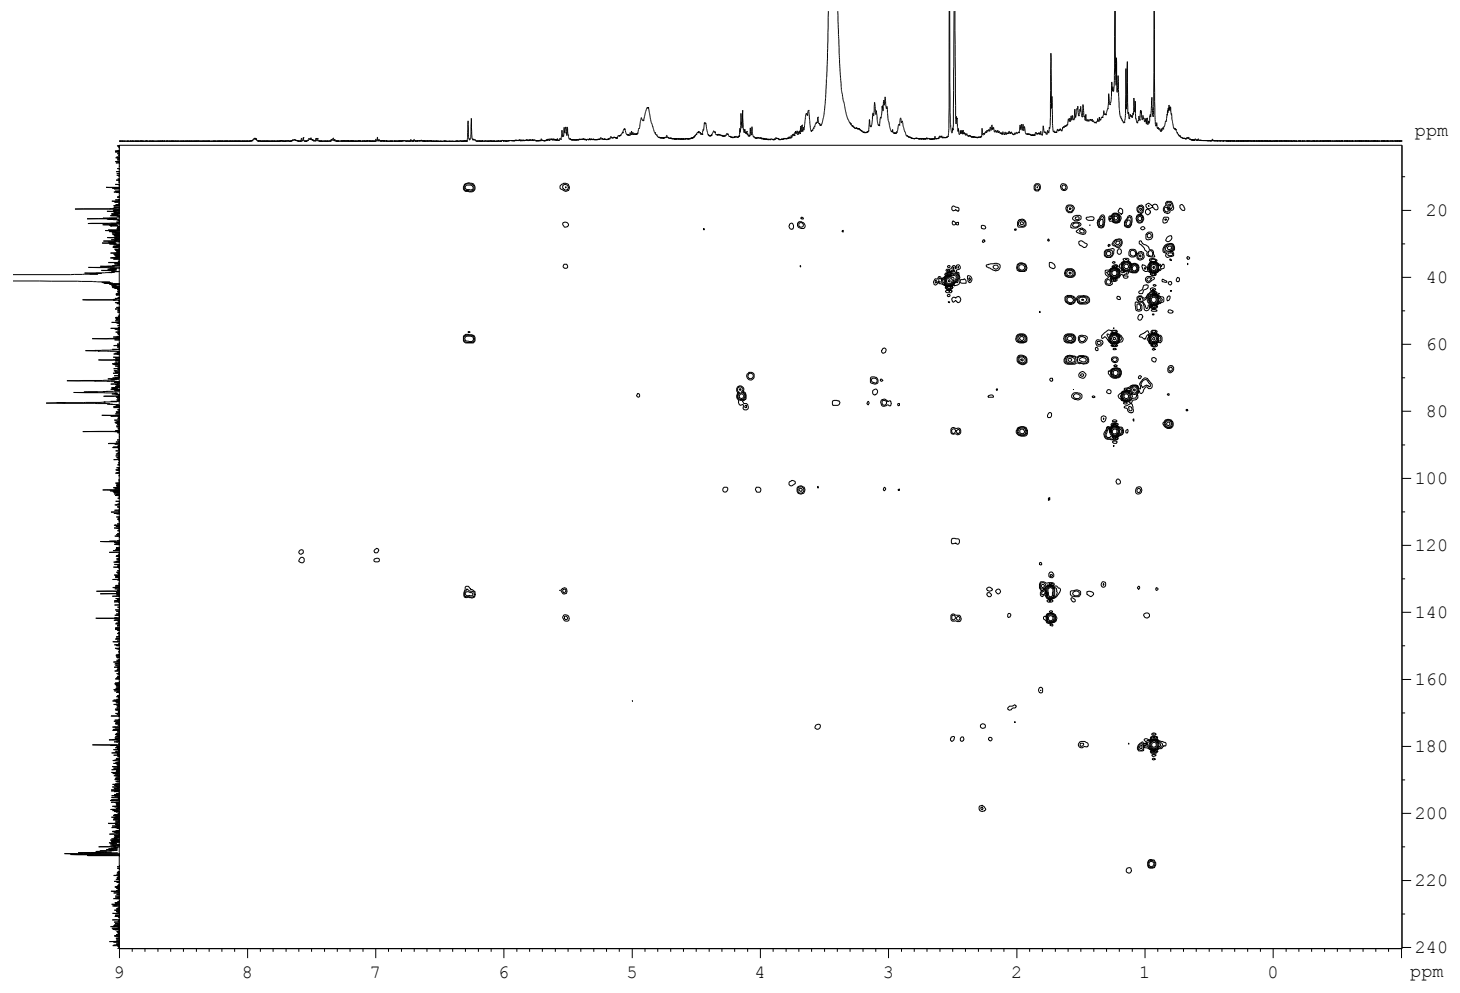

S11. NOESY spectrum (600MHz, DMSO-d6) of compound 2

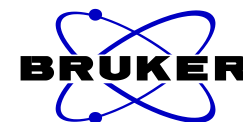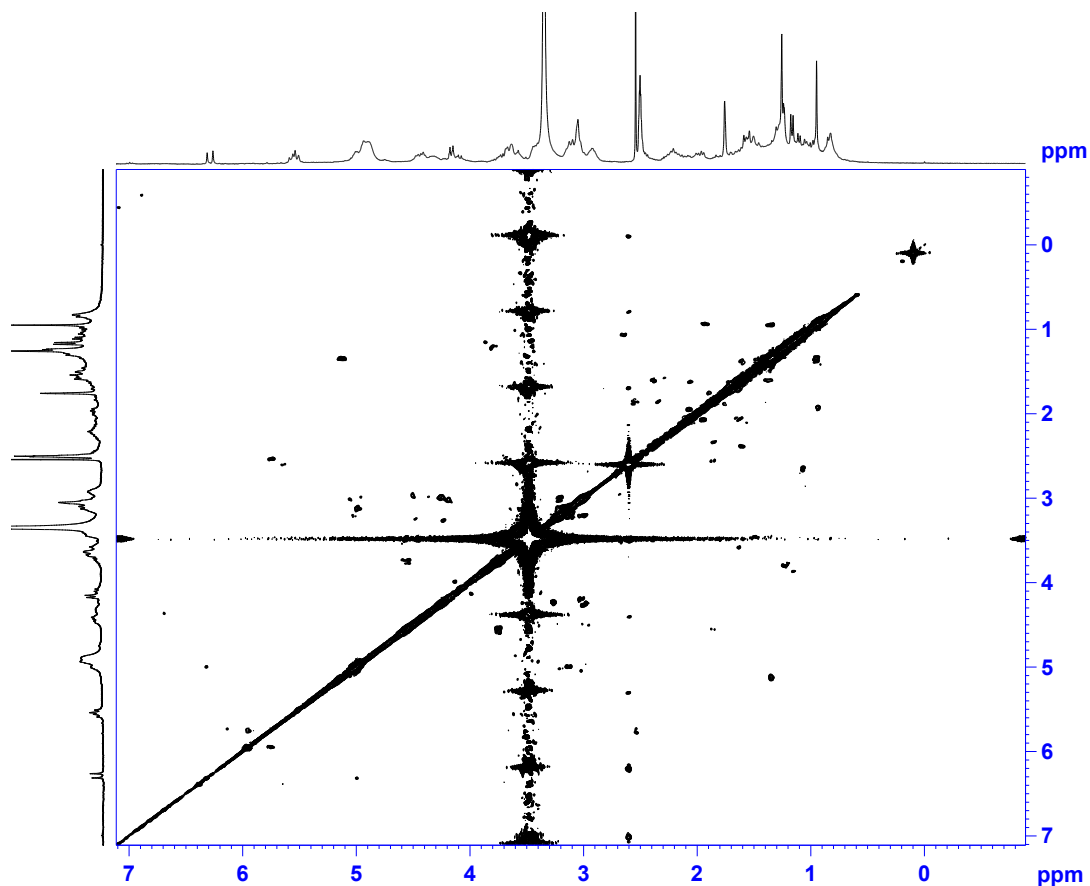

```

NAME          YE-50-1
EXPNO         5
PROCNO        1
Date_         20161010
Time_         14.26
INSTRUM       spect
PROBHD        5 mm PABBO BB-
PULPROG       cosygpgf
TD            1024
SOLVENT       DMSO
NS            50
DS            8
SWH           4807.692 Hz
FIDRES        4.695012 Hz
AQ            0.1066500 sec
RG            1150
DW            104.000 usec
DE            6.50 usec
TE            294.3 K
D0            0.00000300 sec
D1            2.00000000 sec
D13           0.00000400 sec
D16           0.00020000 sec
INO           0.00020800 sec

===== CHANNEL f1 =====
NUC1          1H
P0            11.10 usec
P1            11.10 usec
PL1           -4.00 dB
PL1W          34.70265579 W
SFO1          600.1318004 MHz

===== GRADIENT CHANNEL =====
GPNAM1       SINE.100
GPZ1         16.00 %
P16          1000.00 usec
ND0          1
TD           256
SFO1         600.1318 MHz
FIDRES       18.779905 Hz
SW           8.011 ppm
FnMODE       QF
SI           1024
SF           600.1299352 MHz
WDW          SINE
SSB          0
LB           0.00 Hz
GB           0
PC           1.40
SI           1024
MC2          QF
SF           600.1299371 MHz
WDW          SINE
SSB          0
LB           0.00 Hz
GB           0
    
```

## S12. The HREIMS spectrum of compound 2

### Mass Spectrum Molecular Formula Report

**Analysis Info**  
 Acquisition Date 5/17/2011 11:48:42 AM  
 Analysis Name D:\Data\20110517\YE-50.d  
 Method tune\_50-1000\_POS\_20110328.m  
 Sample Name YE-50  
 Comment YP  
 Instrument / Ser# micrOTOF-Q 125

**Acquisition Parameter**  
 Source Type ESI  
 Focus Not active  
 Scan Begin 50 m/z  
 Scan End 3000 m/z  
 Ion Polarity Positive  
 Set Capillary 4500 V  
 Set End Plate Offset -500 V  
 Set Collision Cell RF 350.0 Vpp  
 Set Nebulizer 0.5 Bar  
 Set Dry Heater 180 °C  
 Set Dry Gas 4.0 l/min  
 Set Divert Valve Source

**Generate Molecular Formula Parameter**  
 Formula, min. C24H38O9  
 Formula, max.  
 Measured m/z 471.259  
 Check Valence no  
 Nitrogen Rule no  
 Filter H/C Ratio no  
 Estimate Carbon yes  
 Tolerance Minimum 4 mDa  
 Electron Configuration both  
 Charge Maximum 1  
 Minimum 0  
 Maximum 3

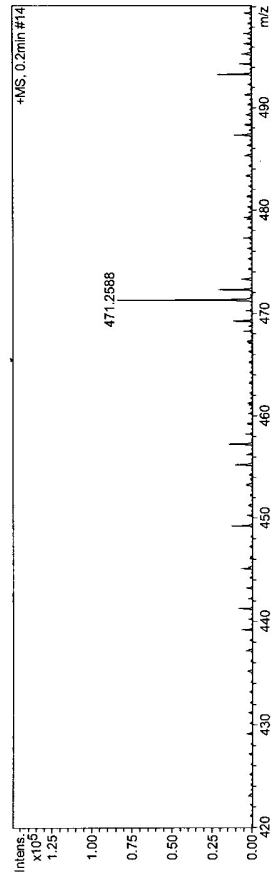

| # | m/z      | I     | Sum Formula | Sigma | m/z      | Err [ppm] | Mean Err [ppm] | Err [mDa] | rdB  | N Rule | a    |
|---|----------|-------|-------------|-------|----------|-----------|----------------|-----------|------|--------|------|
| 1 | 471.2588 | 83549 | C24H38O9    | 0.018 | 471.2589 | 0.17      | -0.46          | 0.08      | 5.50 | ok     | even |

S13. <sup>1</sup>H NMR spectrum (600MHz, DMSO-d<sub>6</sub>) of compound 3

AV-600-1H  
Sample:

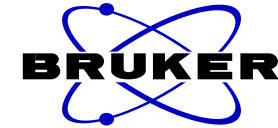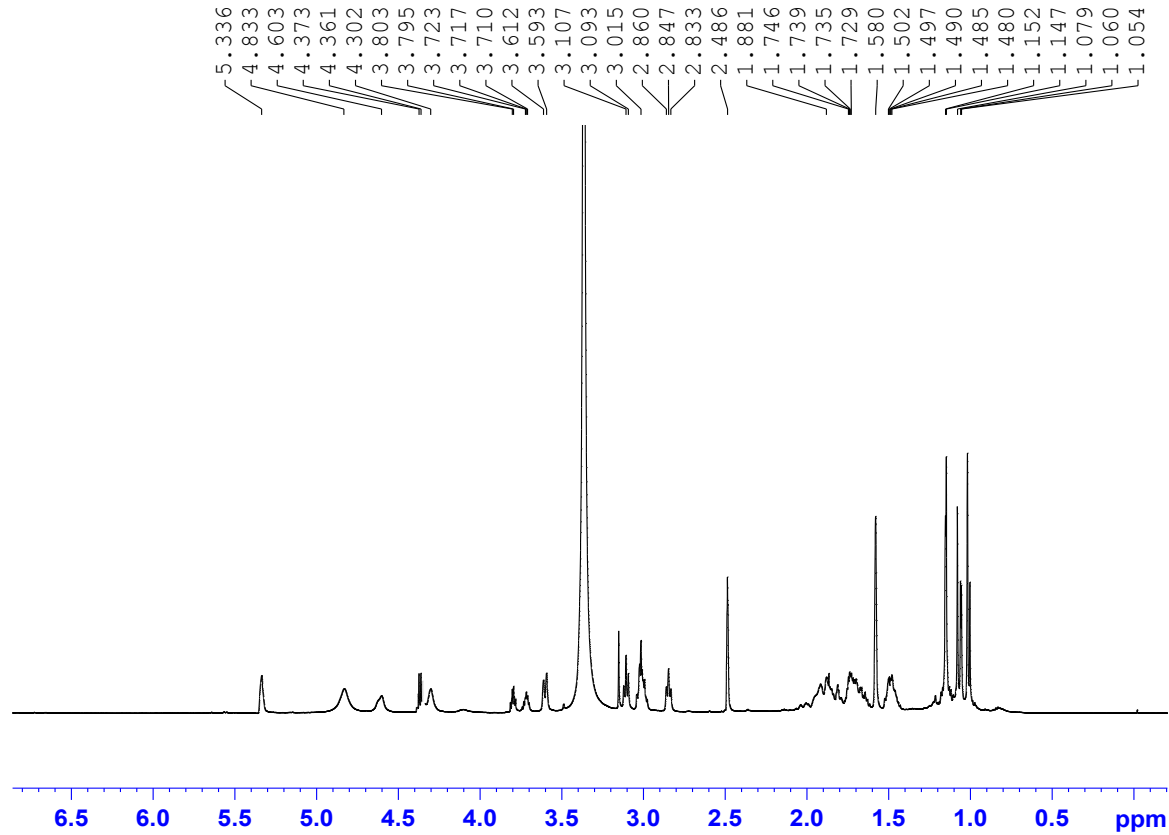

```

NAME          YE-43
EXPNO         1
PROCNO        1
Date_         20101108
Time_         12.37
INSTRUM       spect
PROBHD        5 mm PABBO BB-
PULPROG       zg30
TD            65536
SOLVENT       DMSO
NS            8
DS            2
SWH           13227.514 Hz
FIDRES        0.201836 Hz
AQ            2.4773486 sec
RG            90.5
DW            37.800 usec
DE            6.50 usec
TE            298.2 K
D1            1.00000000 sec
TD0           1
    
```

```

===== CHANNEL f1 =====
NUC1          1H
P1            11.10 usec
PL1           -4.00 dB
PL1W          34.70265579 W
SFO1          600.1333017 MHz
SI            32768
SF            600.1300086 MHz
WDW           EM
SSB           0
LB            0.30 Hz
GB            0
PC            1.00
    
```

S14.  $^{13}\text{C}$  NMR spectrum (150MHz,  $\text{DMSO-}d_6$ ) of compound 3

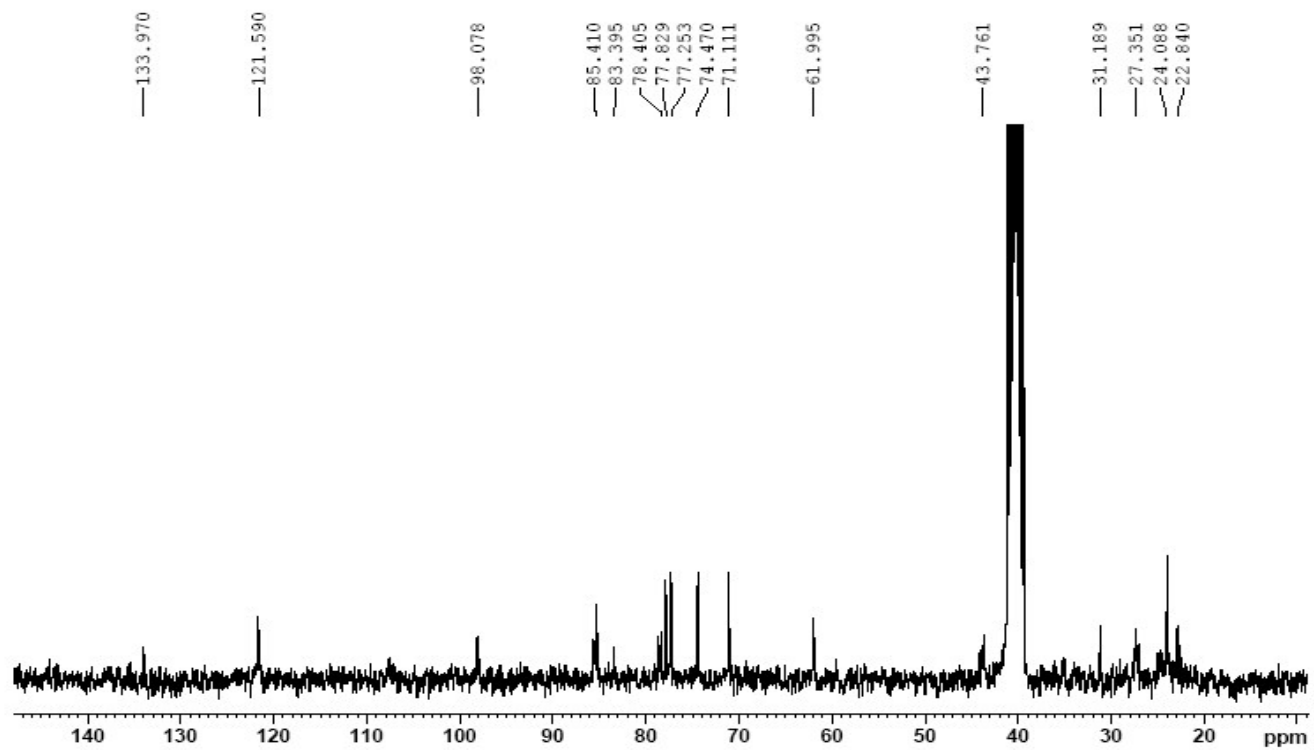



### S15. HSQC spectrum (600MHz, DMSO-*d*6) of compound 3

AV-600-HSQC  
Sample:

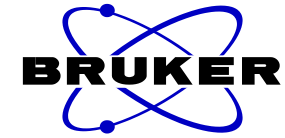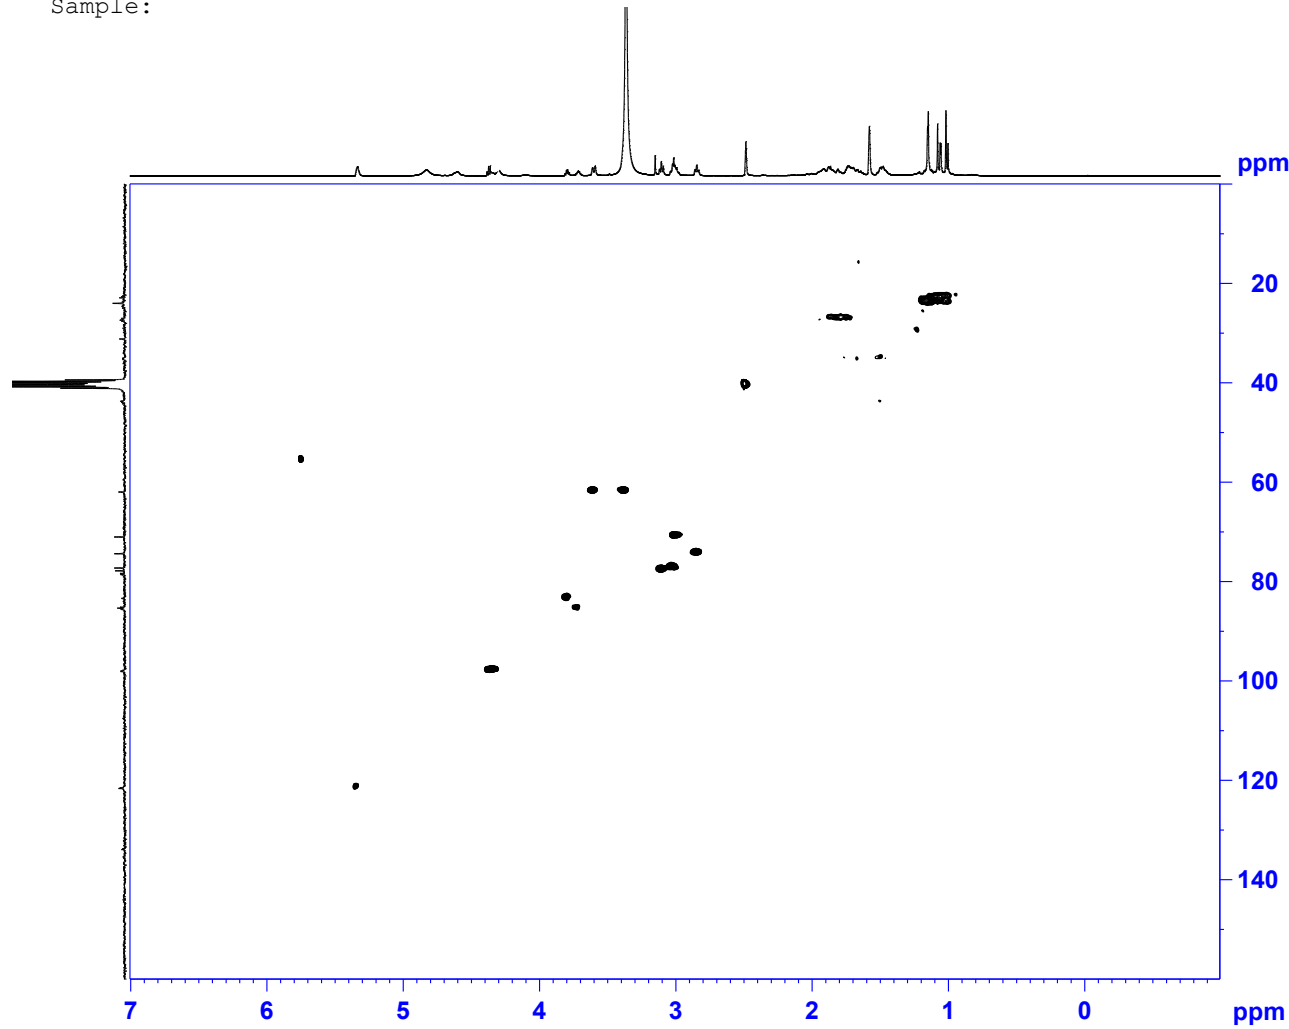

```

NAME          CP2-43
EXPNO         8
PROCNO        1
Date_         20170116
Time         13.06
INSTRUM       spect
PROBHD        5 mm PABBO BB-
PULPROG       hsqcetgpsi
TD            1024
SOLVENT       DMSO
NS            8
DS            16
SWH           4807.692 Hz
FIDRES        4.695012 Hz
AQ            0.1066500 sec
RG            32800
DW            104.000 usec
DE            6.50 usec
TE            294.2 K
CNST2         145.0000000
D0            0.00000300 sec
D1            1.50000000 sec
D4            0.00172414 sec
D11           0.03000000 sec
D13           0.00000400 sec
D16           0.00020000 sec
D24           0.00110000 sec
IN0           0.00001655 sec
ZGOPTNS

===== CHANNEL f1 =====
NUC1          1H
P1            11.10 usec
P2            22.20 usec
P28           2500.00 usec
PL1           -4.00 dB
PL1W          34.70265579 W
SFO1          600.1318004 MHz

===== CHANNEL f2 =====
CPDPRG2       gacp
NUC2          13C
P3            9.53 usec
P4            19.06 usec
PCPD2         80.00 usec
PL2           1.00 dB
PL12          19.48 dB
PL2W          83.20243835 W
PL12W         1.18069065 W
SFO2          150.9163903 MHz

===== GRADIENT CHANNEL =====
GPNAM1        SINE.100
GPNAM2        SINE.100
GFZ1          80.00 %
GFZ2          20.10 %
P16           1000.00 usec
ND0           2
TD            253
SFO1          150.9164 MHz
FIDRES        119.301491 Hz
SW            200.000 ppm
FnMODE        Echo-Antiecho
SI            1024
SF            600.1300000 MHz
WDW           QSINE
SSB           2
LB            0.00 Hz
GB            0
PC            1.40
SI            1024
MC2           echo-antiecho
SF            150.9028090 MHz
WDW           QSINE
SSB           2
LB            0.00 Hz
GB            0
    
```

S16. HMBC spectrum (600MHz, DMSO-*d*<sub>6</sub>) of compound 3

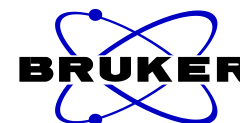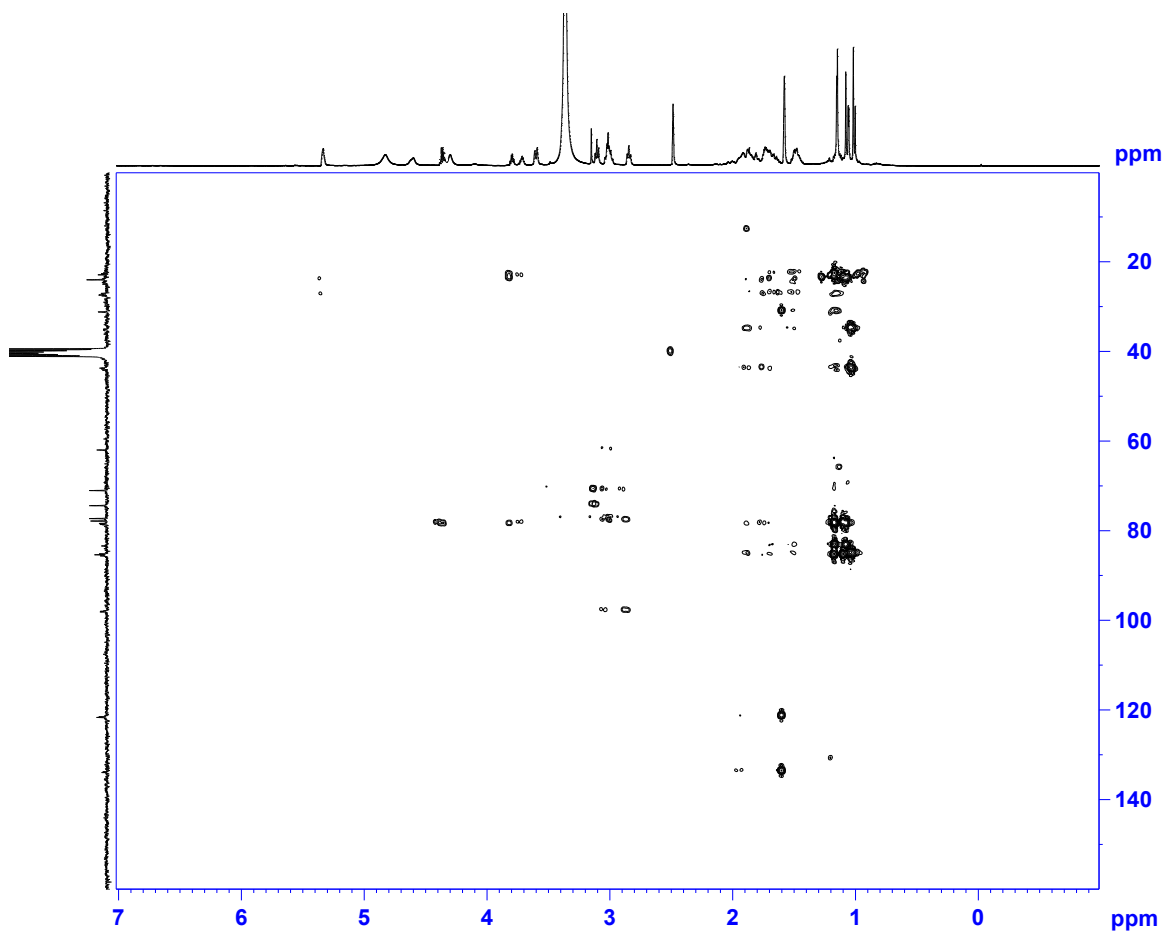

```

NAME          YE-43
EXPNO         9
PROCNO        1
Date_         20101108
Time_         12.48
INSTRUM       spect
PROBHD        5 mm PABBO BB-
PULPROG       hmbcgp1pndqf
TD            1024
SOLVENT       DMSO
NS            32
DS            16
SWH           4807.692 Hz
FIDRES        4.695012 Hz
AQ            0.1066500 sec
RG            29100
DW            104.000 usec
DE            6.50 usec
TE            298.2 K
CNST2        145.0000000
CNST13       5.0000000
DO            0.00000300 sec
D1            1.50000000 sec
D2            0.00344828 sec
D6            0.10000000 sec
D16           0.00020000 sec
IN0           0.00002070 sec

===== CHANNEL f1 =====
NUC1           1H
P1             11.10 usec
P2             22.20 usec
PL1            -4.00 dB
PL1W           34.70265579 W
SFO1           600.1318004 MHz

===== CHANNEL f2 =====
NUC2           13C
P3             8.80 usec
P2            1.00 dB
PL2W           83.20243825 W
SFO2           150.9148812 MHz

===== GRADIENT CHANNEL =====
GPNAM1         SINE.100
GPNAM2         SINE.100
GPNAM3         SINE.100
GPZ1           50.00 %
GPZ2           30.00 %
GPZ3           40.10 %
P16            1000.00 usec
ND0            2
TD             256
SFO1           150.9149 MHz
FIDRES         94.321800 Hz
SW             160.000 ppm
FMODE         QF
SI             1024
SF             600.1299914 MHz
WDW            SINE
SSB            0
LB             0.00 Hz
GB             0
PC             1.40
SI             1024
MC2            QF
SF             150.9028118 MHz
WDW            SINE
SSB            0
LB             0.00 Hz
GB             0
    
```

S17. NOESY spectrum (600MHz, DMSO-*d*6) of compound 3

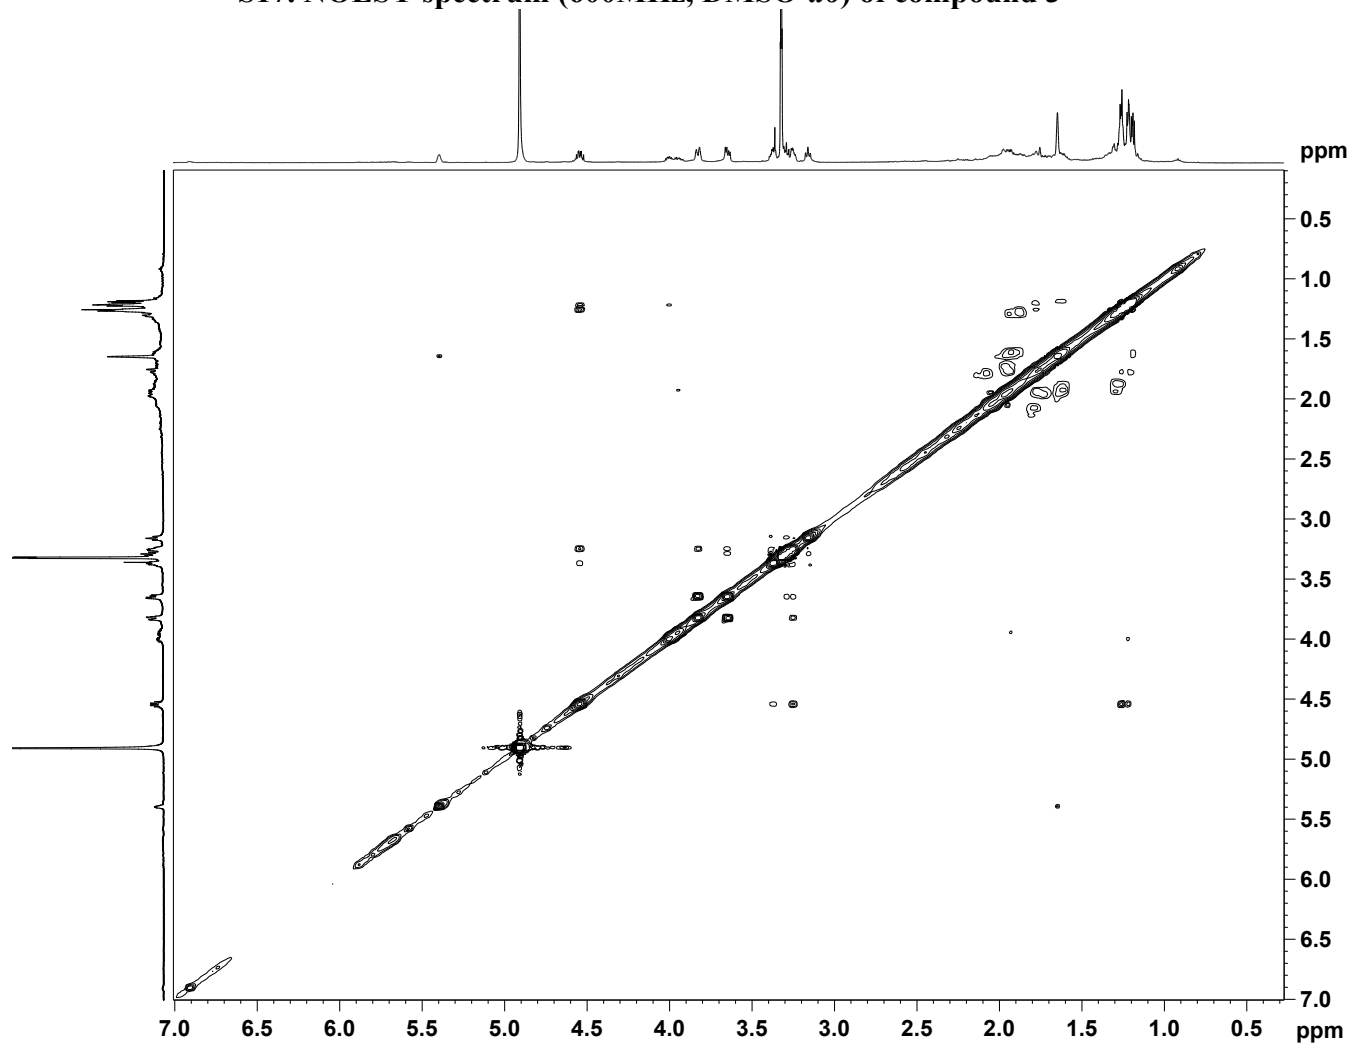

# S18. The HREIMS spectrum of compound 3

## Mass Spectrum Molecular Formula Report

**Analysis Info**  
 Analysis Name D:\Data\20110113\YE-43.d Acquisition Date 1/13/2011 2:01:31 PM  
 Method tune low 100-500.m Instrument / Ser# Bruker Customer  
 Sample Name YE-43 Instrument / Ser# micrOTOF-Q 125  
 Comment

**Acquisition Parameter**  
 Source Type ESI Ion Polarity Positive Set Nebulizer 0.4 Bar  
 Focus Active 4500 V Set Dry Heater 180 °C  
 Scan Begin 50 m/z Set Capillary -500 V Set Dry Gas 4.0 l/min  
 Scan End 3000 m/z Set Collision Cell RF 200.0 Vpp Set Divert Valve Source

**Generate Molecular Formula Parameter**

Formula, min. C21H36O7  
 Formula, max.  
 Measured m/z 401.254 Tolerance 3 ppm  
 Check Name no Minimum 0  
 Nitrogen no Electron Configuration both  
 Filter 13C Ratio no Minimum 0  
 Estimate Carbon yes

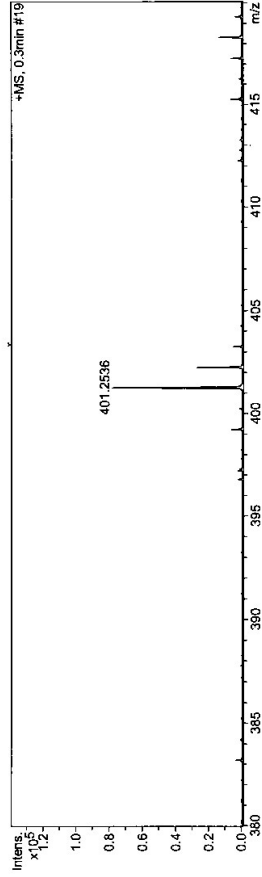

| # | m/z      | I     | Sum Formula | Sigma | m/z      | Err [ppm] | Mean Err [ppm] | Err [mDa] | rdb  | N Rule | e-   |
|---|----------|-------|-------------|-------|----------|-----------|----------------|-----------|------|--------|------|
| 1 | 401.2536 | 78153 | C21H37O7    | 0.137 | 401.2534 | -0.46     | -0.46          | -0.18     | 3.50 | ok     | even |

S19. <sup>1</sup>H NMR spectrum (600MHz, DMSO-*d*<sub>6</sub>) of compound 4

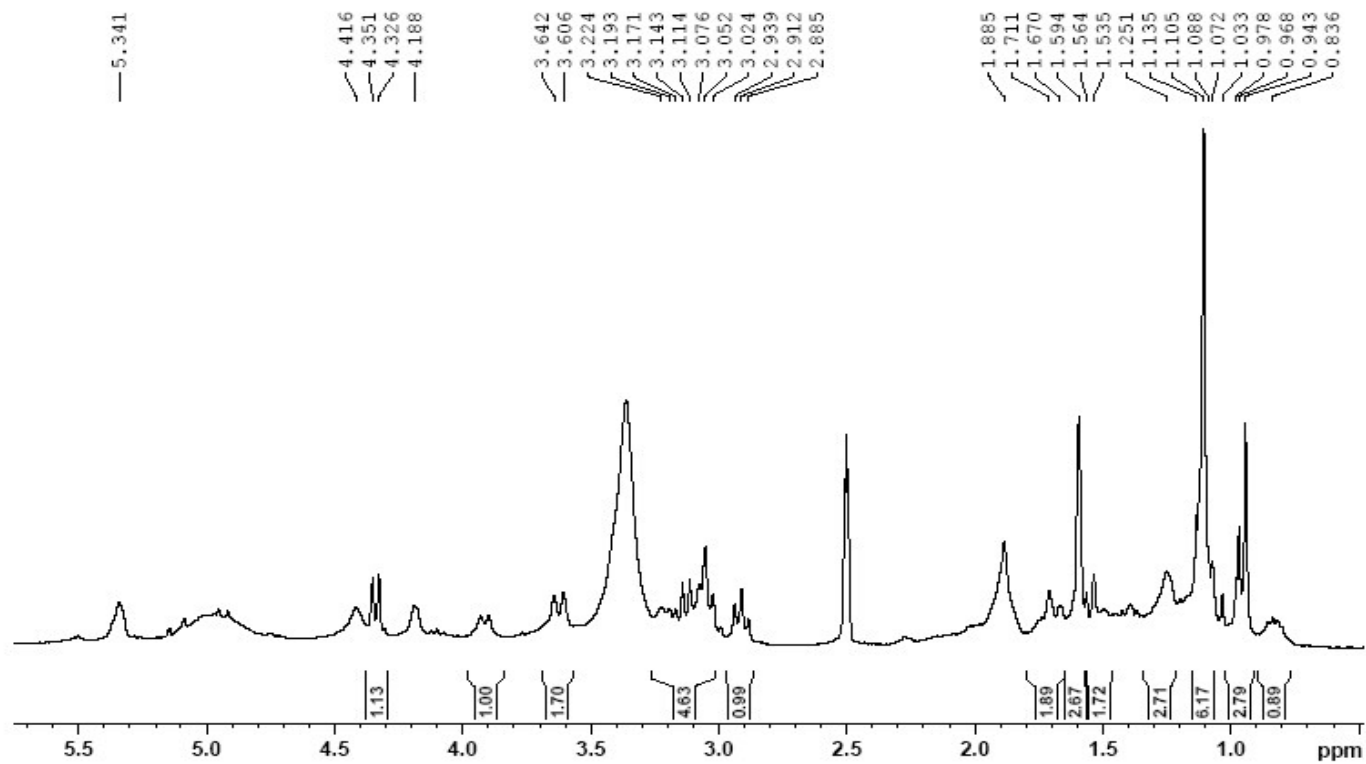

S20.  $^{13}\text{C}$  NMR spectrum (150MHz, DMSO-*d*<sub>6</sub>) of compound 4

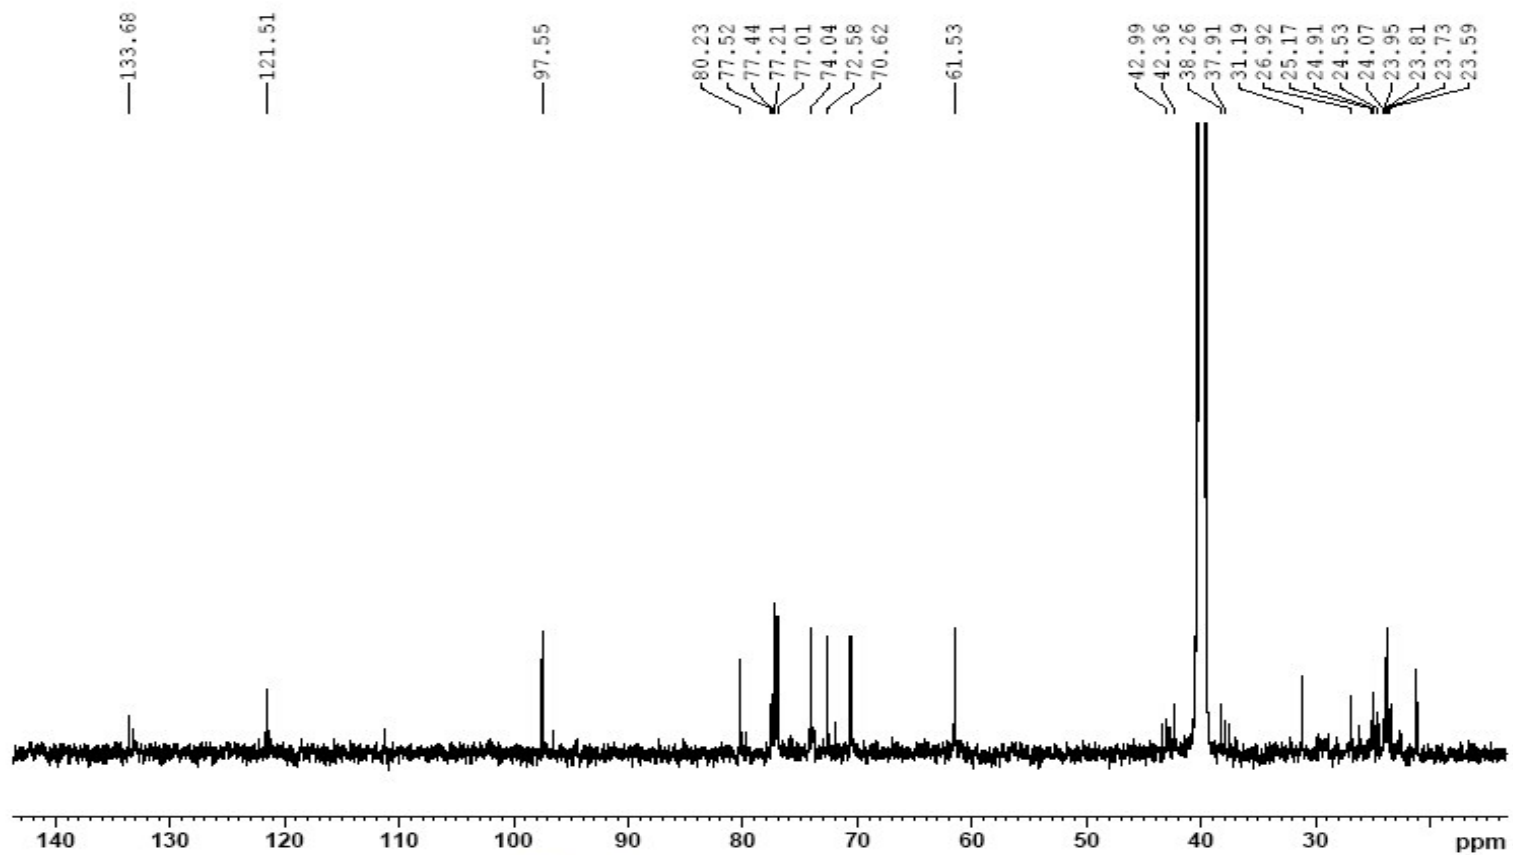

## S21. HSQC spectrum (600MHz, DMSO-*d*<sub>6</sub>) of compound 4

AV-600-HSQC  
Sample:

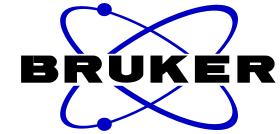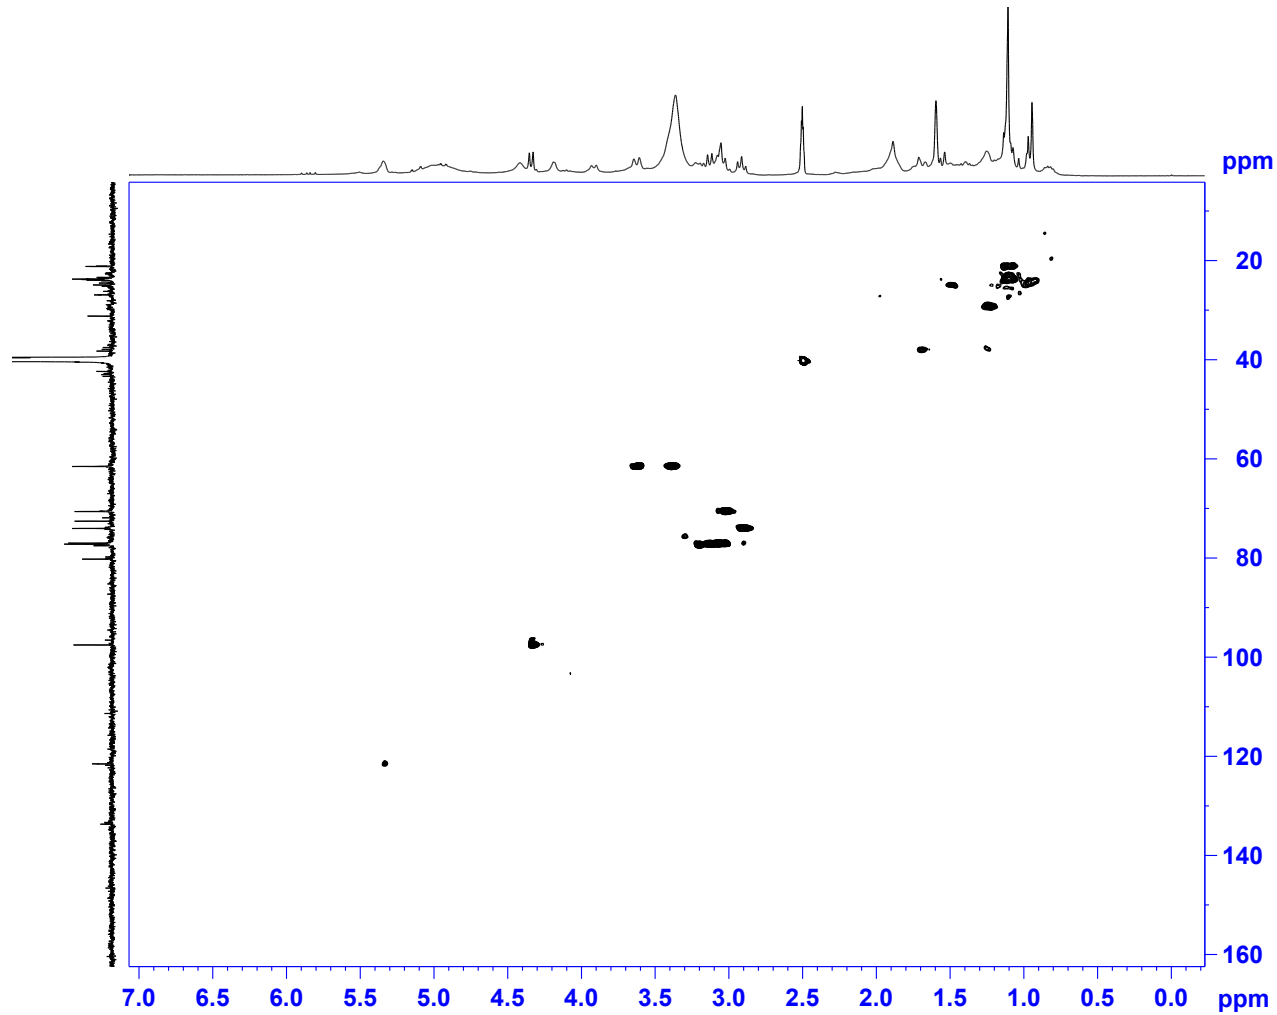

```

NAME          CP2-10
EXPNO         8
PROCNO        1
Date_         20170116
Time          14.59
INSTRUM       spect
PROBHD        5 mm PABBO BB-
PULPROG       hsqcetgpsi
TD            1024
SOLVENT       DMSO
NS            8
DS            16
SWH           6009.615 Hz
FIDRES        5.868765 Hz
AQ            0.0853300 sec
RG            29100
DW            83.200 usec
DE            6.50 usec
TE            293.9 K
CNST2         145.0000000
DO            0.00000300 sec
D1            1.50000000 sec
D4            0.00172414 sec
D11           0.03000000 sec
D13           0.00000400 sec
D16           0.00020000 sec
D24           0.00110000 sec
IN0           0.00001655 sec
ZGOPTNS
    
```

```

===== CHANNEL f1 =====
NUC1          1H
P1            11.10 usec
P2            22.20 usec
P28           2500.00 usec
PL1           -4.00 dB
PL1W          34.70265579 W
SFO1          600.1324005 MHz
    
```

```

===== CHANNEL f2 =====
CPDPRG2       garp
NUC2          13C
P3            9.53 usec
P4            19.06 usec
PCPD2         80.00 usec
PL2           1.00 dB
PL12          19.48 dB
PL2W          83.20243835 W
PL12W         1.18069065 W
SFO2          150.9163903 MHz
    
```

```

===== GRADIENT CHANNEL =====
GPNAM1        SINE.100
GPNAM2        SINE.100
GPZ1          80.00 %
GPZ2          20.10 %
PI6           1000.00 usec
ND0           2
TD            256
SFO1          150.9164 MHz
FIDRES        117.903427 Hz
SW            200.000 ppm
FnMODE        Echo-Antiecho
SI            1024
SF            600.1300000 MHz
WDW           QSINE
SSB           2
LB            0.00 Hz
GB            0
FC            1.40
SI            1024
MC2           echo-antiecho
SF            150.9028090 MHz
WDW           QSINE
SSB           2
LB            0.00 Hz
GB            0
    
```

S22. H-H COSY spectrum (600MHz, DMSO-*d*<sub>6</sub>) of compound 4

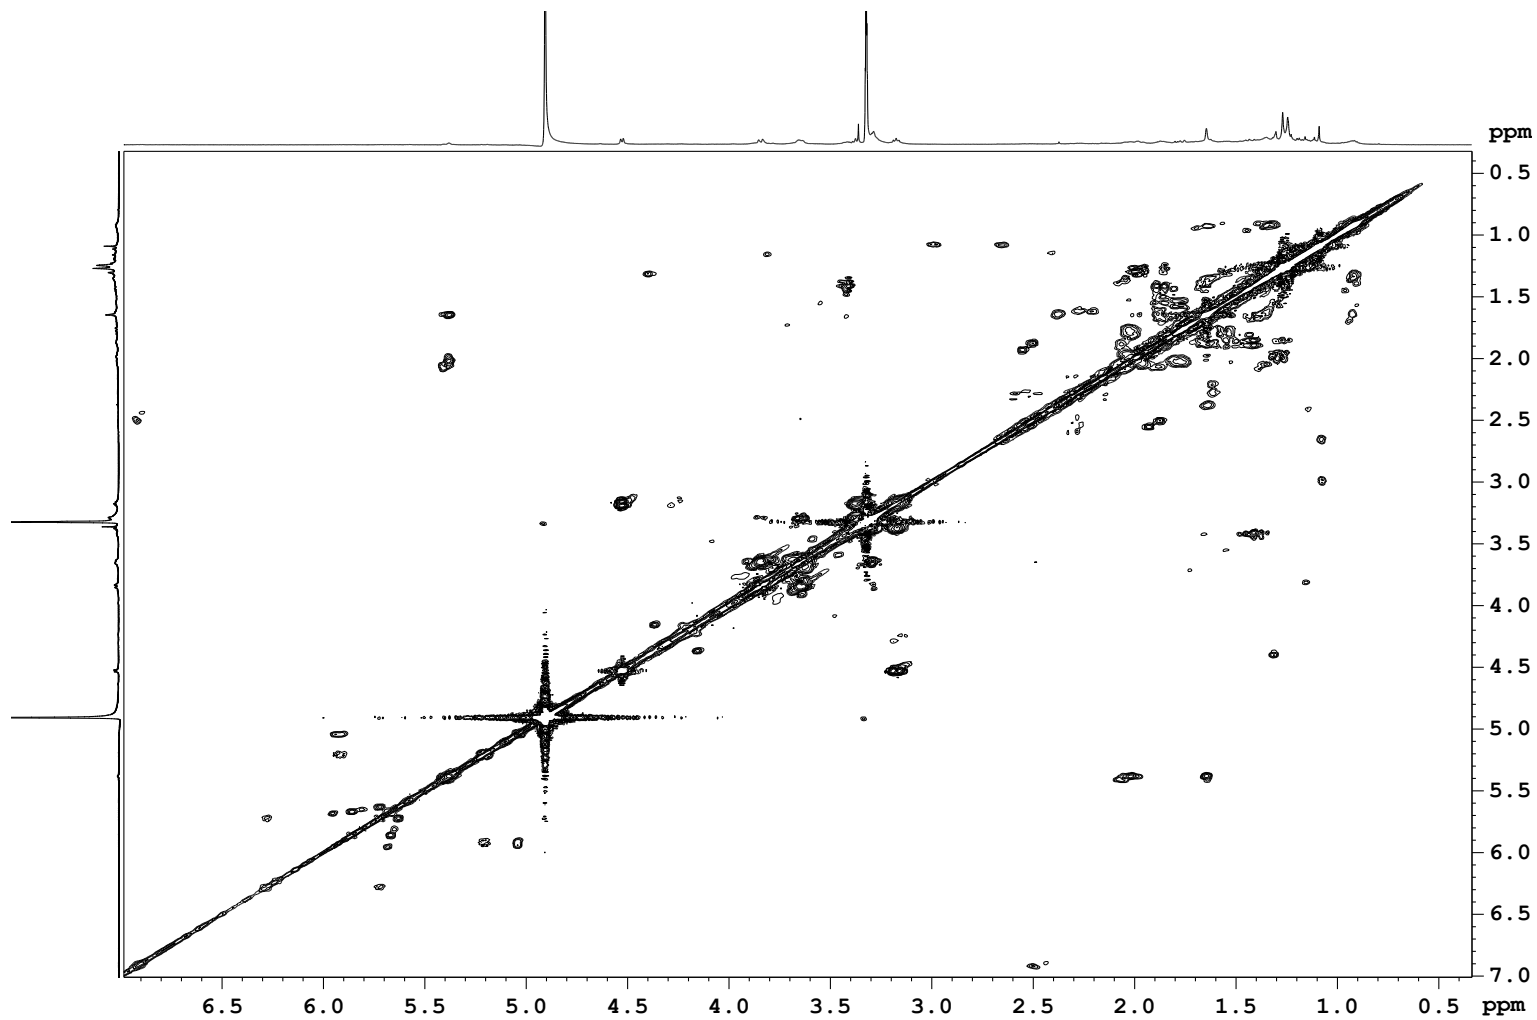



## S23.The HREIMS spectrum of compound 4

### Mass Spectrum Molecular Formula Report

**Analysis Info**  
 Analysis Name: D:\Data\20110107\YE-10-1.d  
 Method: tune low 100-500.m  
 Sample Name: YE-10  
 Comment:  
 Acquisition Date: 1/7/2011 3:56:17 PM  
 Operator: Bruker Customer  
 Instrument / Ser#: micrOTOF-Q 125

**Acquisition Parameter**  
 Source Type: ESI  
 Focus: Active  
 Scan Begin: 50 m/z  
 Scan End: 3000 m/z  
 Ion Polarity: Positive  
 Set Capillary: 4500 V  
 Set End Plate Offset: -500 V  
 Set Collision Cell RF: 250.0 Vpp  
 Set Nebulizer: 0.4 Bar  
 Set Dry Heater: 180 °C  
 Set Dry Gas: 4.0 l/min  
 Set Divert Valve: Source

**Generate Molecular Formula Parameter**

Formula, min: C21H38O8  
 Formula, max: 419.264  
 Measured m/z: no  
 Check Valence: no  
 Nitrogen Rule: no  
 Filter H/C Ratio: no  
 Estimate Carbon: yes  
 Tolerance: 3 ppm  
 Minimum: 0  
 Electron Configuration: both  
 Minimum: 0  
 Maximum: 3  
 Charge: 1  
 Maximum: 0  
 Minimum: 3

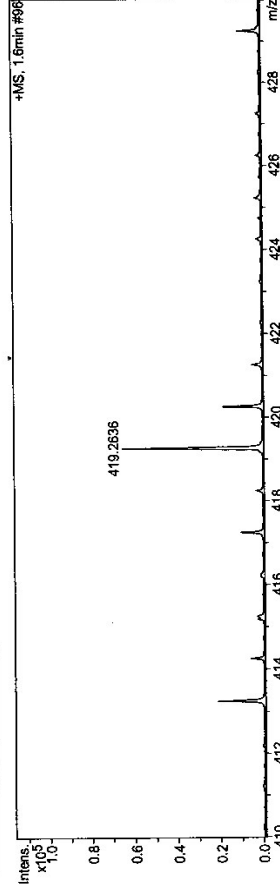

| # | m/z      | I     | Sum Formula | Sigma | Err [ppm] | Mean Err [ppm] | Err [mDa] | rdB  | N Rule | e-   |
|---|----------|-------|-------------|-------|-----------|----------------|-----------|------|--------|------|
| 1 | 419.2636 | 63338 | C21H38O8    | 0.032 | 419.2639  | 0.78           | 0.33      | 2.50 | ok     | even |

S24.  $\text{Rh}_2(\text{OCOCF}_3)_4$  induced CD spectrum of 1a

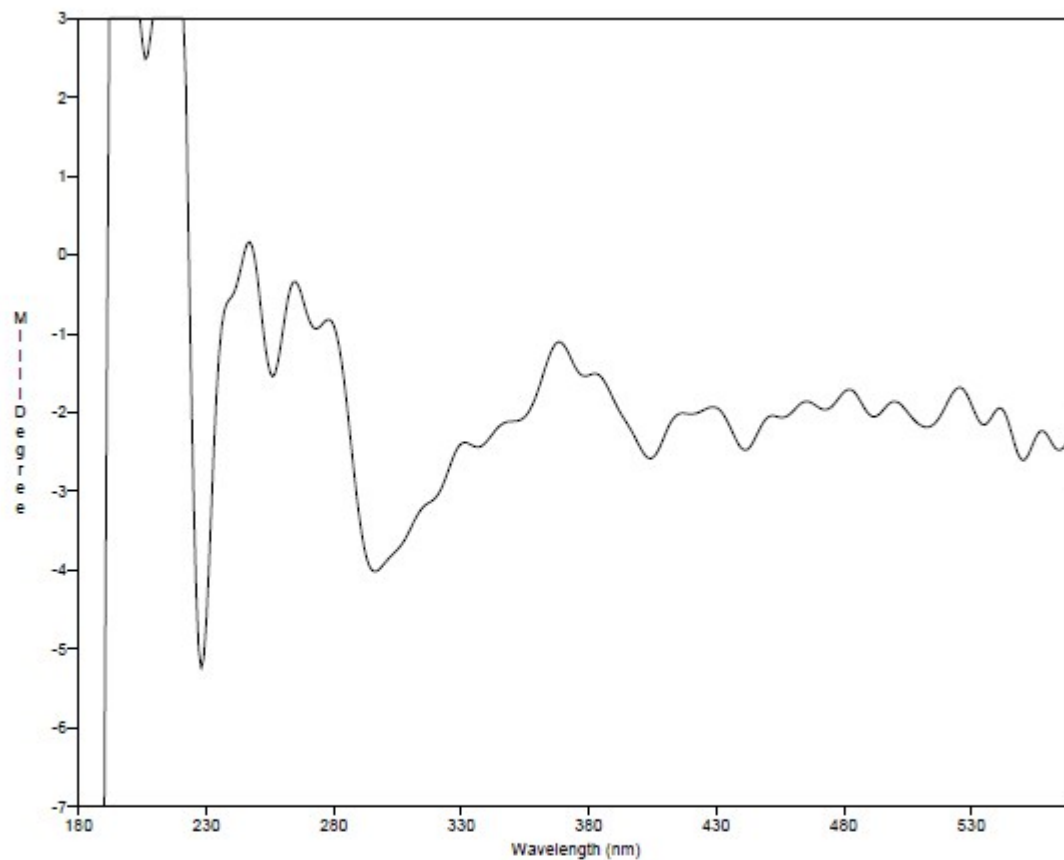

Bio-Kline Software V4.74 Date : 2016-9-4 Time : 19:11:50

COMMENTS :

File name : d:\高晶一149ly.bka  
 Savitzky-Golay Smooth of sav-golay  
 Window Points=15  
 Polynomial Order=3  
 Derivative=0

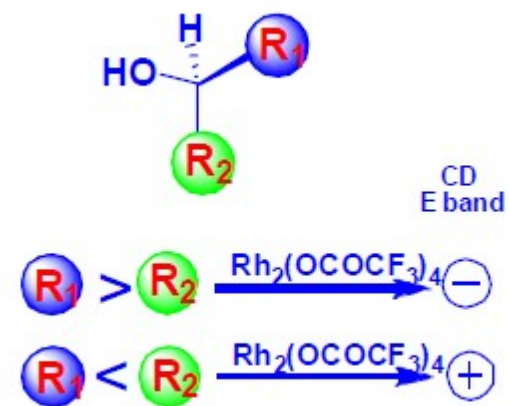

### S25. Rh<sub>2</sub>(OCOCF<sub>3</sub>)<sub>4</sub> induced CD spectrum of 5

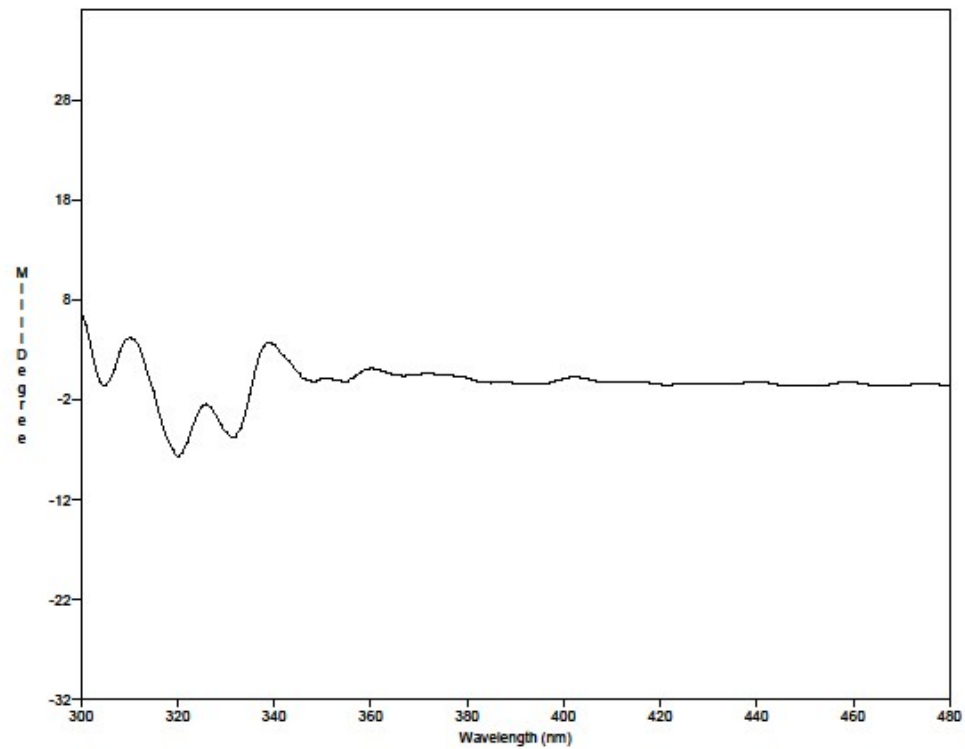

Bio-Kine Software V4.74 Date : 2016-6-23 Time : 20:18:08

COMMENTS :  
File name : d:\高晶一\ye5yuan5.bka  
MOS-450 Spectrometer  
Spectrum measurement  
Acq duration = .5 s  
Bioline V4.74
